# Supplementary material for: Applying prior knowledge of regulatory signaling to investigate macrophage cAMP dynamics during Mycobacterium tuberculosis infection
Source: Research Square preprint supplement (doi:10.21203/rs.3.rs-7265502/v1), 2025-09-11
Supplement: Supplementary file 1 [file f10d3af59112c6bbea965e5d.xlsx]

## Sheet: Table S1(a)
Table S1. (a) Pathway membership of NER extracted entities as documented in the Pathway Commons database
	Number of entities	Intersecting entities	Pathway name	Source	Gene count	id	adjusted p_value
	8	IRF3, IFI16, AIM2, CGAS, MYD88, DDX41, TBK1, TREX1	Cytosolic sensors of pathogen-associated DNA	reactome	64	REAC:R-HSA-1834949	1.67839e-08
	6	IRF3, IFI16, CGAS, DDX41, TBK1, TREX1	STING mediated induction of host immune responses	reactome	16	REAC:R-HSA-1834941	4.37009e-08
	7	STAT1, IRF3, CGAS, CD14, MYD88, TBK1, TLR9	positive regulation of type I interferon production	go	73	GO:0032481	2.2142e-06
	5	IRF3, IFI16, DDX41, TBK1, TREX1	IRF3-mediated induction of type I IFN	reactome	13	REAC:R-HSA-3270619	3.91373e-06
	6	CRP, IL6, CD14, MYD88, TNF, TLR9	interleukin-8 production	go	83	GO:0032637	8.37516e-06
	6	CRP, IL6, CD14, MYD88, TNF, TLR9	regulation of interleukin-8 production	go	83	GO:0032677	8.37516e-06
	8	STAT1, IRF3, CGAS, CD14, MYD88, TBK1, TREX1, TLR9	type I interferon production	go	122	GO:0032606	4.95776e-05
	8	STAT1, IRF3, CGAS, CD14, MYD88, TBK1, TREX1, TLR9	regulation of type I interferon production	go	122	GO:0032479	4.95776e-05
	6	IL6, NLRP3, IFI16, AIM2, MYD88, TNF	positive regulation of interleukin-1 beta production	go	60	GO:0032731	6.60733e-05
	4	STAT1, IRF3, TBK1, TLR9	positive regulation of interferon-alpha production	go	26	GO:0032727	0.000107195
	5	IL6, CD14, MYD88, TNF, TLR9	positive regulation of interleukin-8 production	go	63	GO:0032757	0.000111138
	6	IL6, NLRP3, IFI16, AIM2, MYD88, TNF	positive regulation of interleukin-1 production	go	71	GO:0032732	0.000120575
	4	STAT1, IRF3, TBK1, TLR9	regulation of interferon-alpha production	go	32	GO:0032647	0.000246395
	4	STAT1, IRF3, TBK1, TLR9	interferon-alpha production	go	32	GO:0032607	0.000246395
	6	IL6, NLRP3, IFI16, AIM2, MYD88, TNF	interleukin-1 beta production	go	93	GO:0032611	0.000430227
	6	IL6, NLRP3, IFI16, AIM2, MYD88, TNF	regulation of interleukin-1 beta production	go	93	GO:0032651	0.000430227
	6	IL6, NLRP3, IFI16, AIM2, MYD88, TNF	regulation of interleukin-1 production	go	110	GO:0032652	0.000815042
	6	IL6, NLRP3, IFI16, AIM2, MYD88, TNF	interleukin-1 production	go	110	GO:0032612	0.000815042
	5	TRPA1, ASIC2, TRPM8, TRPV1, ASIC3	Stimuli-sensing channels	reactome	105	REAC:R-HSA-2672351	0.000848721
	4	IRF3, DDX41, TBK1, TREX1	Regulation of innate immune responses to cytosolic DNA	reactome	15	REAC:R-HSA-3134975	0.00128893
	3	IRF3, CD14, TBK1	Activation of IRF3, IRF7 mediated by TBK1, IKKŒµ (IKBKE)	reactome	16	REAC:R-HSA-936964	0.00158409
	4	IRF3, CD14, MYD88, TBK1	toll-like receptor 4 signaling pathway	go	57	GO:0034142	0.00342071
	3	IRF3, MYD88, TBK1	ZBP1(DAI) mediated induction of type I IFNs	reactome	21	REAC:R-HSA-1606322	0.00373516
	4	IRF3, CD14, MYD88, TBK1	cell surface toll-like receptor signaling pathway	go	64	GO:0140895	0.00564926
	5	IRF3, CD14, MYD88, TBK1, TLR9	Toll-like Receptor Cascades	reactome	164	REAC:R-HSA-168898	0.0074971
	3	IL6, MYD88, TNF	positive regulation of cytokine production involved in inflammatory response	go	28	GO:1900017	0.00761867
	4	IRF3, CD14, MYD88, TBK1	cell surface pattern recognition receptor signaling pathway	go	71	GO:0002752	0.00880614
	8	IRF3, NLRP3, CGAS, MYD88, TBK1, TREX1, TNF, TLR9	cytoplasmic pattern recognition receptor signaling pathway	go	162	GO:0002753	0.00885727
	3	TRPA1, TRPM8, TRPV1	TRP channels	reactome	28	REAC:R-HSA-3295583	0.00910779
	3	CRP, IL6, TNF	negative regulation of lipid storage	go	22	GO:0010888	0.0104328
	5	TRPA1, ASIC2, TRPM8, TRPV1, ASIC3	Ion channel transport	reactome	182	REAC:R-HSA-983712	0.0123673
	6	SAMHD1, STAT1, IRF3, MYD88, TBK1, TREX1	type I interferon-mediated signaling pathway	go	82	GO:0060337	0.0131101
	6	SAMHD1, STAT1, IRF3, MYD88, TBK1, TREX1	cellular response to type I interferon	go	83	GO:0071357	0.0138323
	4	STAT1, IFI16, AIM2, TREX1	cellular response to interferon-beta	go	27	GO:0035458	0.0138599
	2	IRF3, TBK1	IRF3 mediated activation of type 1 IFN	reactome	5	REAC:R-HSA-1606341	0.0142415
	4	CRP, IL6, TRPV1, TNF	acute-phase response	go	49	GO:0006953	0.0158215
	4	IL6, MYD88, TNF, TLR9	positive regulation of interleukin-6 production	go	98	GO:0032755	0.0161755
	6	SAMHD1, STAT1, IRF3, MYD88, TBK1, TREX1	response to type I interferon	go	89	GO:0034340	0.0187995
	4	IRF3, CD14, MYD88, TBK1	innate immune response activating cell surface receptor signaling pathway	go	90	GO:0002220	0.0227707
	4	STAT1, IFI16, AIM2, TREX1	response to interferon-beta	go	34	GO:0035456	0.0315168
	3	STAT1, AIM2, CGAS	positive regulation of defense response to virus by host	go	34	GO:0002230	0.0348532
	6	SAMHD1, STAT1, IRF3, MYD88, TBK1, TREX1	interferon-mediated signaling pathway	go	107	GO:0140888	0.0368736
	7	CRP, IL6, NLRP3, CAMP, MYD88, TBK1, TNF	defense response to Gram-positive bacterium	go	120	GO:0050830	0.0368736
	2	IL6, TNF	positive regulation of glial cell proliferation	go	21	GO:0060252	0.0496632

## Sheet: Table S1(b)
Table S1. (b) Interaction relationships extracted by INDRA from the Pathway Commons database (* denotes contradictory database entries)
	Index	Source Entity	Target Entity	Regulatory Action
	0	IL6	IL6ST	Positive
	1	IL6	STAT3	Uncertain*
	2	IL6	EGFR	Positive
	3	IL6	CRP	Positive
	4	IL6	IL17A	Positive
	5	IL6	POU2F1	Positive
	6	IL6	RORA	Positive
	7	IL6	POMC	Positive
	8	IL6	SERPINA3	Positive
	9	IL6	IL6	Positive
	10	IL6	IL1B	Negative
	11	IL6	AKT	Positive
	12	IL6	INS	Negative
	13	IL6	ADIPOQ	Negative
	14	IL6	ERK	Positive
	15	IL6	PI3K	Positive
	16	IL6	MAPK14	Positive
	17	IL6	MAPK3	Positive
	18	IL6	HCK	Positive
	19	TNF	IL6	Uncertain
	20	TNF	MAPK1	Uncertain
	21	TNF	IKBKB	Positive
	22	TNF	PTGS2	Positive
	23	TNF	IKBKG	Positive
	24	TNF	RIPK1	Positive
	25	TNF	IL18	Positive
	26	TNF	CXCL12	Positive
	27	TNF	CCL2	Positive
	28	TNF	CD40LG	Positive
	29	TNF	CD14	Positive
	30	TNF	STAT3	Positive
	31	TNF	AGT	Positive
	32	TNF	TRAF2	Positive
	33	TNF	IFNG	Positive
	34	TNF	TLR2	Positive
	35	TNF	TGFA	Positive
	36	TNF	PTEN	Positive
	37	TNF	CD40	Positive
	38	TNF	TIMP3	Positive
	39	TNF	MAP3K1	Positive
	40	TNF	TNF	Uncertain
	41	TNF	CRP	Positive
	42	TNF	STAT1	Positive
	43	TNF	NOS3	Negative
	44	TNF	ADIPOQ	Negative
	45	TNF	ERBB2	Negative
	46	TNF	EGFR	Negative
	47	TNF	TNFRSF1A	Positive
	48	TNF	RIPK2	Positive
	49	TNF	CHUK	Positive
	50	TNF	ERK	Positive
	51	TNF	AKT2	Positive
	52	TNF	XDH	Positive
	53	TNF	TNFRSF1B	Positive
	54	TNF	MAPK3	Negative
	55	TNF	POU2F1	Negative
	56	PI3K	CD14	Positive
	57	CD14	TNF	Positive
	58	CD14	TLR2	Positive
	59	ERBB2	IL6	Positive
	60	PTGS2	CRP	Positive
	61	PTGS2	TNF	Negative
	62	CRP	CCL2	Positive
	63	CRP	TNF	Positive
	64	CRP	NFKBIA	Negative
	65	AKT	TNF	Uncertain
	66	NFKBIA	TNF	Positive
	67	STAT1	IFNG	Positive
	68	STAT1	TNF	Negative
	69	STAT1	IFNA1	Negative
	70	IFNG	MYD88	Positive
	71	IFNG	STAT1	Positive
	72	IFNG	TNF	Uncertain
	73	IFNG	IL6	Positive
	74	IFNG	IFI16	Positive
	75	AGT	IL6	Positive
	76	AGT	TNF	Positive
	77	MAPK1	IL6	Positive
	78	MAPK1	STAT1	Positive
	79	AKT2	TNF	Uncertain
	80	CCL2	IL6	Positive
	81	TRAF2	TNF	Positive
	82	EGFR	IL6	Positive
	83	EGFR	STAT1	Positive
	84	IKBKG	TNF	Positive
	85	NOS3	TNF	Positive
	86	CD40	IL6	Positive
	87	IKBKB	TNF	Positive
	88	MAP3K1	TNF	Positive
	89	EP300	TNF	Positive
	90	TNFRSF1A	IL6	Positive
	91	MAPK3	TNF	Positive
	92	MAPK3	STAT1	Positive
	93	IFI16	TNF	Positive
	94	IL1B	IL6	Positive
	95	IL1B	CRP	Positive
	96	IL1B	TNF	Positive
	97	TLR2	MYD88	Positive
	98	TLR2	TNF	Positive
	99	MYD88	IRAK1	Positive
	100	MYD88	IRF5	Positive
	101	RIPK1	TNF	Uncertain
	102	TLR9	CXCL8	Positive
	103	TLR9	MYD88	Positive
	104	TLR9	IRF7	Positive
	105	CXCL8	CRP	Positive
	106	IL18	TNF	Positive
	107	IL18	IL6	Positive
	108	CXCL12	IRF3	Positive
	109	CXCL12	IL6	Positive
	110	CD40LG	TNF	Positive
	111	CD40LG	IL6	Positive
	112	STAT3	TNF	Negative
	113	STAT3	IFI16	Positive
	114	TGFA	TLR9	Positive
	115	PTEN	TNF	Negative
	116	TIMP3	TNF	Positive
	117	CHUK	TNF	Positive
	118	IRF3	IFNA1	Positive
	119	IRF3	IFNB1	Positive
	120	IRF3	EP300	Positive
	121	HCK	IL6	Positive
	122	IFNA1	STAT1	Positive
	123	IFNA1	CD14	Positive
	124	IL6ST	IL6	Positive
	125	IL6ST	STAT1	Positive
	126	IL17A	TNF	Positive
	127	IL17A	IL6	Positive
	128	POU2F1	TNF	Negative
	129	RORA	TNF	Negative
	130	POMC	IL6	Negative
	131	SERPINA3	TNF	Negative
	132	INS	IL6	Positive
	133	INS	TNF	Negative
	134	IFNB1	TNF	Negative
	135	IRF5	MYD88	Positive
	136	IRF5	STAT1	Positive
	137	IRF7	MYD88	Positive
	138	MAPK14	TNF	Positive
	139	RIPK2	TNF	Positive
	140	XDH	IL6	Positive
	141	ERK	CRP	Positive
	142	ERK	IL6	Negative
	143	TNFRSF1B	TNF	Negative
	144	ADIPOQ	TNF	Negative
	145	IRAK1	STAT1	Positive
	146	TLR3	TBK1	Positive
	147	TLR3	IRF3	Positive
	148	TBK1	TLR3	Positive

## Sheet: Table S1(c)
Table S1. (c) Interaction relationships involving cAMP predicted by the CleanLab Trustworthy LLM (CleanLab, San Francisco, CA)
	Index	Source Entity	Target Entity	Regulatory Action	Trustworthiness Score
	0	CAMP	CRP	Positive	0.989
	1	CAMP	NOS3	Positive	0.935
	2	CAMP	PTGS2	Positive	0.932
	3	CAMP	TNF	Negative	0.932
	4	CAMP	IKBKB	Negative	0.847
	5	CXCL12	CAMP	Negative	0.793
	6	ERK	CAMP	Negative	0.763
	7	TNF	CAMP	Negative	0.763
	8	CAMP	NFKBIA	Negative	0.753
	9	CAMP	TLR3	Negative	0.735
	10	CAMP	TLR9	Negative	0.735
	11	CAMP	STAT3	Positive	0.626
	12	CAMP	INFB1	Positive	0.623
	13	TIMP3	CAMP	Negative	0.593
	14	IFNG	CAMP	Negative	0.593
	15	AKT2	CAMP	Negative	0.593
	16	CAMP	IRF5	Negative	0.593
	17	CAMP	INFA1	Negative	0.593
	18	CAMP	PTEN	Negative	0.593
	19	CAMP	TLR2	Negative	0.593
	20	CXCL8	CAMP	Negative	0.565
	21	IFI16	CAMP	Negative	0.565
	22	CAMP	IRF3	Negative	0.565
	23	CAMP	RIPK1	Negative	0.565
	24	CAMP	IKBKG	Negative	0.565
	25	TLR9	CAMP	Negative	0.564
	26	ADIPOQ	CAMP	Positive	0.56
	27	NOS3	CAMP	Negative	0.537
	28	CAMP	TBK1	Negative	0.537
	29	CAMP	AGT	Negative	0.526
	30	CAMP	POU2F1	Positive	0.518
	31	CAMP	EP300	Positive	0.518
	32	TBK1	CAMP	Negative	0.516
	33	TNFRSF1B	CAMP	Negative	0.481
	34	RIPK2	CAMP	Negative	0.481
	35	PTEN	CAMP	Negative	0.481
	36	CD40LG	CAMP	Negative	0.481
	37	IL18	CAMP	Negative	0.481
	38	MYD88	CAMP	Negative	0.481
	39	TLR2	CAMP	Negative	0.481
	40	MAP3K1	CAMP	Negative	0.481
	41	TRAF2	CAMP	Negative	0.481
	42	AGT	CAMP	Negative	0.481
	43	CAMP	CHUK	Negative	0.481
	44	CAMP	ADIPOQ	Positive	0.463
	45	CAMP	TNFRSF1B	Negative	0.453
	46	POU2F1	CAMP	Negative	0.452
	47	INFA1	CAMP	Negative	0.452
	48	IL6	CAMP	Negative	0.452
	49	CRP	CAMP	Negative	0.452
	50	CD14	CAMP	Negative	0.452
	51	IRF5	CAMP	Negative	0.424
	52	CAMP	IL6	Positive	0.417
	53	PTGS2	CAMP	Negative	0.393
	54	CAMP	IRF7	Positive	0.382
	55	CAMP	RIPK2	Positive	0.27
	56	CAMP	MAPK3	Positive	0.236
	57	CAMP	AKT2	Positive	0.214
	58	CAMP	IFNG	Positive	0.204
	59	CAMP	CXCL8	Positive	0.135
	60	CAMP	ERK	Positive	0.134

## Sheet: Table S1(d)(e)
Table S1. (d) Additional interaction relationships required to balance positive and negative regulation predicted by the CleanLab Trustworthy LLM (CleanLab, San Francisco, CA)
	Index	Source Entity	Target Entity	Regulatory Action	Trustworthiness Score
	164	MAPK1	IL1B	Positive	0.987
	165	MAPK3	IL1B	Positive	0.948
	166	MAPK14	IL1B	Positive	0.968
	167	IFNG	IL1B	Positive	0.967
	168	PI3K	ERBB2	Positive	Not expected
	169	AKT	ERBB2	Positive	Not expected
	170	IL1B	INS	Positive	Not expected
	171	IL6	INS	Positive	Not expected
	172	TNF	INS	Positive	Not expected
	173	IL1B	NFKBIA	Positive	0.58
	174	TNF	NFKBIA	Positive	0.648
	175	IFNG	AGT	-Positive	0.84
Table S1. (e) Additional interaction relationships required to provide positive regulation of cAMP extracted by text-mining to the EmBiology database (Elsevier, Amsterdam, NL)
	Index	Source Entity	Target Entity	Regulatory Action	EmBiology Citations
	176	EGFR	CAMP	Positive	4
	177	MAPK1	CAMP	Positive	25

## Sheet: Table S2
Table S2. Expected stable persistence behaviors expected of the regulatory network (Low=0, Mid-range=1, High=2, Unknown=-99)
	Index	Entity	C1 (uninfected baseline)	C2 (persistent cAMP upregulation)	C3 (persistent infection)	C3 Ref.
	0	IL6	0	-99	2	Ayalew S, Wegayehu T, Wondale B, Tarekegn A, Tessema B, Admasu F, Piantadosi A, Sahi M, Gebresilase TT, Fredolini C, Mihret A. Candidate serum protein biomarkers for active pulmonary tuberculosis diagnosis in tuberculosis endemic settings. BMC infectious diseases. 2024 Nov 21;24(1):1329.
	1	IL6ST	0	-99	-99
	2	STAT3	0	-99	2	Queval CJ, Song OR, Deboosère N, Delorme V, Debrie AS, Iantomasi R, Veyron-Churlet R, Jouny S, Redhage K, Deloison G, Baulard A. STAT3 represses nitric oxide synthesis in human macrophages upon Mycobacterium tuberculosis infection. Scientific reports. 2016 Jul 7;6(1):29297.
	3	EGFR	0	-99	-99
	4	CRP	0	-99	-99
	5	IL17A	0	-99	2	Ayalew S, Wegayehu T, Wondale B, Tarekegn A, Tessema B, Admasu F, Piantadosi A, Sahi M, Gebresilase TT, Fredolini C, Mihret A. Candidate serum protein biomarkers for active pulmonary tuberculosis diagnosis in tuberculosis endemic settings. BMC infectious diseases. 2024 Nov 21;24(1):1329.
	6	POU2F1	0	-99	-99
	7	RORA	0	-99	-99
	8	POMC	0	-99	-99
	9	SERPINA3	0	-99	2	HaileMariam M, Yu Y, Singh H, Teklu T, Wondale B, Worku A, Zewude A, Mounaud S, Tsitrin T, Legesse M, Gobena A. Protein and microbial biomarkers in sputum discern acute and latent tuberculosis in investigation of pastoral Ethiopian cohort. Frontiers in cellular and infection microbiology. 2021 Jun 4;11:595554.
	10	IL1B	0	-99	2	Silvério D, Gonçalves R, Appelberg R, Saraiva M. Advances on the Role and Applications of Interleukin-1 in Tuberculosis. MBio. 2021 Dec 21;12(6):e03134-21.
	11	AKT	0	-99	-99
	12	INS	0	-99	-99
	13	ADIPOQ	0	-99	-99
	14	ERK	0	-99	-99
	15	PI3K	0	-99	-99
	16	MAPK14	0	-99	-99
	17	MAPK3	0	-99	-99
	18	HCK	0	-99	-99
	19	TNF	0	-99	2
	20	MAPK1	0	-99	-99
	21	IKBKB	0	-99	-99
	22	PTGS2	0	-99	-99
	23	IKBKG	0	-99	-99
	24	RIPK1	0	-99	-99
	25	IL18	0	-99	2	Rothchild AC, Jayaraman P, Nunes-Alves C, Behar SM. iNKT cell production of GM-CSF controls Mycobacterium tuberculosis. PLoS pathogens. 2014 Jan 2;10(1):e1003805.
	26	CXCL12	0	-99	0	Silvério D, Gonçalves R, Appelberg R, Saraiva M. Advances on the Role and Applications of Interleukin-1 in Tuberculosis. MBio. 2021 Dec 21;12(6):e03134-21.; Kawka M, Płocińska R, Płociński P, Pawełczyk J, Słomka M, Gatkowska J, Dzitko K, Dziadek B, Dziadek J. The functional response of human monocyte-derived macrophages to serum amyloid A and Mycobacterium tuberculosis infection. Frontiers in Imm…
	27	CCL2	0	-99	2	David GR, Cardona PJ, Kim MJ, Allain S, Altare F. Foamy macrophages and the progression of the human TB granulom. Nat Immunol. 2009;10(9):943-8.
	28	CD40LG	0	-99	-99
	29	CD14	0	-99	-99
	30	AGT	0	-99	-99
	31	TRAF2	0	-99	-99
	32	IFNG	0	-99	2	Ayalew S, Wegayehu T, Wondale B, Tarekegn A, Tessema B, Admasu F, Piantadosi A, Sahi M, Gebresilase TT, Fredolini C, Mihret A. Candidate serum protein biomarkers for active pulmonary tuberculosis diagnosis in tuberculosis endemic settings. BMC infectious diseases. 2024 Nov 21;24(1):1329.
	33	TLR2	0	-99	2	Wang JY, Chang HC, Liu JL, Shu CC, Lee CH, Wang JT, Lee LN. Expression of toll-like receptor 2 and plasma level of interleukin-10 are associated with outcome in tuberculosis. European journal of clinical microbiology & infectious diseases. 2012 Sep;31:2327-33.
	34	TGFA	0	-99	-99
	35	PTEN	0	-99	-99
	36	CD40	0	-99	2	Ayalew S, Wegayehu T, Wondale B, Tarekegn A, Tessema B, Admasu F, Piantadosi A, Sahi M, Gebresilase TT, Fredolini C, Mihret A. Candidate serum protein biomarkers for active pulmonary tuberculosis diagnosis in tuberculosis endemic settings. BMC infectious diseases. 2024 Nov 21;24(1):1329.
	37	TIMP3	0	-99	-99
	38	MAP3K1	0	-99	-99
	39	STAT1	0	-99	-99
	40	NOS3	0	-99	-99
	41	ERBB2	0	-99	-99
	42	TNFRSF1A	0	-99	-99
	43	RIPK2	0	-99	-99
	44	CHUK	0	-99	-99
	45	AKT2	0	-99	-99
	46	XDH	0	-99	-99
	47	TNFRSF1B	0	-99	-99
	48	NFKBIA	0	-99	-99
	49	IFNA1	0	-99	-99
	50	MYD88	0	-99	-99
	51	IFI16	0	-99	-99
	52	EP300	0	-99	-99
	53	IRAK1	0	-99	-99
	54	IRF5	0	-99	-99
	55	TLR9	0	-99	2	Ankley L, Thomas S, Olive AJ. Fighting persistence: how chronic infections with Mycobacterium tuberculosis evade T cell-mediated clearance and new strategies to defeat them. Infection and immunity. 2020 Jun 22;88(7):10-128.
	56	CXCL8	0	-99	2	Silvério D, Gonçalves R, Appelberg R, Saraiva M. Advances on the Role and Applications of Interleukin-1 in Tuberculosis. MBio. 2021 Dec 21;12(6):e03134-21.; Kawka M, Płocińska R, Płociński P, Pawełczyk J, Słomka M, Gatkowska J, Dzitko K, Dziadek B, Dziadek J. The functional response of human monocyte-derived macrophages to serum amyloid A and Mycobacterium tuberculosis infection. Frontiers in Imm…
	57	IRF7	0	-99	-99
	58	IRF3	0	-99	-99
	59	IFNB1	0	-99	-99
	60	TLR3	0	-99	-99
	61	TBK1	0	-99	-99
	62	CAMP	0	2	-99

## Sheet: Table S3 
Table S3. Activation profiles predicted by a sample of 100 competing models satisfying all 3 steady state conditions within a 5% tolerance (6 bits across 63 state variables)
	Predicted State
Constraint	C1
State Variable Index	0	1	2	3	4	5	6	7	8	9	10	11	12	13	14	15	16	17	18	19	20	21	22	23	24	25	26	27	28	29	30	31	32	33	34	35	36	37	38	39	40	41	42	43	44	45	46	47	48
Stae variable Name	IL6	IL6ST	STAT3	EGFR	CRP	IL17A	POU2F1	RORA	POMC	SERPINA3	IL1B	AKT	INS	ADIPOQ	ERK	PI3K	MAPK14	MAPK3	HCK	TNF	MAPK1	IKBKB	PTGS2	IKBKG	RIPK1	IL18	CXCL12	CCL2	CD40LG	CD14	AGT	TRAF2	IFNG	TLR2	TGFA	PTEN	CD40	TIMP3	MAP3K1	STAT1	NOS3	ERBB2	TNFRSF1A	RIPK2	CHUK	AKT2	XDH	TNFRSF1B	NFKBIA
Model index
0	0	0	0	0	0	0	0	0	0	0	0	0	0	0	0	0	0	0	0	0	0	0	0	0	0	0	0	0	0	0	0	0	0	0	0	0	0	0	0	0	0	0	0	0	0	0	0	0	0
1	0	0	0	0	0	0	0	0	0	0	0	0	0	0	0	0	0	0	0	0	0	0	0	0	0	0	0	0	0	0	0	0	0	0	0	0	0	0	0	0	0	0	0	0	0	0	0	0	0
2	0	0	0	0	0	0	0	0	0	0	0	0	0	0	0	0	0	0	0	0	0	0	0	0	0	0	0	0	0	0	0	0	0	0	0	0	0	0	0	0	0	0	0	0	0	0	0	0	0
3	0	0	0	0	0	0	0	0	0	0	0	0	0	0	0	0	0	0	0	0	0	0	0	0	0	0	0	0	0	0	0	0	0	0	0	0	0	0	0	0	0	0	0	0	0	0	0	0	0
4	0	0	0	0	0	0	0	0	0	0	0	0	0	0	0	0	0	0	0	0	0	0	0	0	0	0	0	0	0	0	0	0	0	0	0	0	0	0	0	0	0	0	0	0	0	0	0	0	0
5	0	0	0	0	0	0	0	0	0	0	0	0	0	0	0	0	0	0	0	0	0	0	0	0	0	0	0	0	0	0	0	0	0	0	0	0	0	0	0	0	0	0	0	0	0	0	0	0	0
6	0	0	0	0	0	0	0	0	0	0	0	0	0	0	0	0	0	0	0	0	0	0	0	0	0	0	0	0	0	0	0	0	0	0	0	0	0	0	0	0	0	0	0	0	0	0	0	0	0
7	0	0	0	0	0	0	0	0	0	0	0	0	0	0	0	0	0	0	0	0	0	0	0	0	0	0	0	0	0	0	0	0	0	0	0	0	0	0	0	0	0	0	0	0	0	0	0	0	0
8	0	0	0	0	0	0	0	0	0	0	0	0	0	0	0	0	0	0	0	0	0	0	0	0	0	0	0	0	0	0	0	0	0	0	0	0	0	0	0	0	0	0	0	0	0	0	0	0	0
9	0	0	0	0	0	0	0	0	0	0	0	0	0	0	0	0	0	0	0	0	0	0	0	0	0	0	0	0	0	0	0	0	0	0	0	0	0	0	0	0	0	0	0	0	0	0	0	0	0
10	0	0	0	0	0	0	0	0	0	0	0	0	0	0	0	0	0	0	0	0	0	0	0	0	0	0	0	0	0	0	0	0	0	0	0	0	0	0	0	0	0	0	0	0	0	0	0	0	0
11	0	0	0	0	0	0	0	0	0	0	0	0	0	0	0	0	0	0	0	0	0	0	0	0	0	0	0	0	0	0	0	0	0	0	0	0	0	0	0	0	0	0	0	0	0	0	0	0	0
12	0	0	0	0	0	0	0	0	0	0	0	0	0	0	0	0	0	0	0	0	0	0	0	0	0	0	0	0	0	0	0	0	0	0	0	0	0	0	0	0	0	0	0	0	0	0	0	0	0
13	0	0	0	0	0	0	0	0	0	0	0	0	0	0	0	0	0	0	0	0	0	0	0	0	0	0	0	0	0	0	0	0	0	0	0	0	0	0	0	0	0	0	0	0	0	0	0	0	0
14	0	0	0	0	0	0	0	0	0	0	0	0	0	0	0	0	0	0	0	0	0	0	0	0	0	0	0	0	0	0	0	0	0	0	0	0	0	0	0	0	0	0	0	0	0	0	0	0	0
15	0	0	0	0	0	0	0	0	0	0	0	0	0	0	0	0	0	0	0	0	0	0	0	0	0	0	0	0	0	0	0	0	0	0	0	0	0	0	0	0	0	0	0	0	0	0	0	0	0
16	0	0	0	0	0	0	0	0	0	0	0	0	0	0	0	0	0	0	0	0	0	0	0	0	0	0	0	0	0	0	0	0	0	0	0	0	0	0	0	0	0	0	0	0	0	0	0	0	0
17	0	0	0	0	0	0	0	0	0	0	0	0	0	0	0	0	0	0	0	0	0	0	0	0	0	0	0	0	0	0	0	0	0	0	0	0	0	0	0	0	0	0	0	0	0	0	0	0	0
18	0	0	0	0	0	0	0	0	0	0	0	0	0	0	0	0	0	0	0	0	0	0	0	0	0	0	0	0	0	0	0	0	0	0	0	0	0	0	0	0	0	0	0	0	0	0	0	0	0
19	0	0	0	0	0	0	0	0	0	0	0	0	0	0	0	0	0	0	0	0	0	0	0	0	0	0	0	0	0	0	0	0	0	0	0	0	0	0	0	0	0	0	0	0	0	0	0	0	0
20	0	0	0	0	0	0	0	0	0	0	0	0	0	0	0	0	0	0	0	0	0	0	0	0	0	0	0	0	0	0	0	0	0	0	0	0	0	0	0	0	0	0	0	0	0	0	0	0	0
21	0	0	0	0	0	0	0	0	0	0	0	0	0	0	0	0	0	0	0	0	0	0	0	0	0	0	0	0	0	0	0	0	0	0	0	0	0	0	0	0	0	0	0	0	0	0	0	0	0
22	0	0	0	0	0	0	0	0	0	0	0	0	0	0	0	0	0	0	0	0	0	0	0	0	0	0	0	0	0	0	0	0	0	0	0	0	0	0	0	0	0	0	0	0	0	0	0	0	0
23	0	0	0	0	0	0	0	0	0	0	0	0	0	0	0	0	0	0	0	0	0	0	0	0	0	0	0	0	0	0	0	0	0	0	0	0	0	0	0	0	0	0	0	0	0	0	0	0	0
24	0	0	0	0	0	0	0	0	0	0	0	0	0	0	0	0	0	0	0	0	0	0	0	0	0	0	0	0	0	0	0	0	0	0	0	0	0	0	0	0	0	0	0	0	0	0	0	0	0
25	0	0	0	0	0	0	0	0	0	0	0	0	0	0	0	0	0	0	0	0	0	0	0	0	0	0	0	0	0	0	0	0	0	0	0	0	0	0	0	0	0	0	0	0	0	0	0	0	0
26	0	0	0	0	0	0	0	0	0	0	0	0	0	0	0	0	0	0	0	0	0	0	0	0	0	0	0	0	0	0	0	0	0	0	0	0	0	0	0	0	0	0	0	0	0	0	0	0	0
27	0	0	0	0	0	0	0	0	0	0	0	0	0	0	0	0	0	0	0	0	0	0	0	0	0	0	0	0	0	0	0	0	0	0	0	0	0	0	0	0	0	0	0	0	0	0	0	0	0
28	0	0	0	0	0	0	0	0	0	0	0	0	0	0	0	0	0	0	0	0	0	0	0	0	0	0	0	0	0	0	0	0	0	0	0	0	0	0	0	0	0	0	0	0	0	0	0	0	0
29	0	0	0	0	0	0	0	0	0	0	0	0	0	0	0	0	0	0	0	0	0	0	0	0	0	0	0	0	0	0	0	0	0	0	0	0	0	0	0	0	0	0	0	0	0	0	0	0	0
30	0	0	0	0	0	0	0	0	0	0	0	0	0	0	0	0	0	0	0	0	0	0	0	0	0	0	0	0	0	0	0	0	0	0	0	0	0	0	0	0	0	0	0	0	0	0	0	0	0
31	0	0	0	0	0	0	0	0	0	0	0	0	0	0	0	0	0	0	0	0	0	0	0	0	0	0	0	0	0	0	0	0	0	0	0	0	0	0	0	0	0	0	0	0	0	0	0	0	0
32	0	0	0	0	0	0	0	0	0	0	0	0	0	0	0	0	0	0	0	0	0	0	0	0	0	0	0	0	0	0	0	0	0	0	0	0	0	0	0	0	0	0	0	0	0	0	0	0	0
33	0	0	0	0	0	0	0	0	0	0	0	0	0	0	0	0	0	0	0	0	0	0	0	0	0	0	0	0	0	0	0	0	0	0	0	0	0	0	0	0	0	0	0	0	0	0	0	0	0
34	0	0	0	0	0	0	0	0	0	0	0	0	0	0	0	0	0	0	0	0	0	0	0	0	0	0	0	0	0	0	0	0	0	0	0	0	0	0	0	0	0	0	0	0	0	0	0	0	0
35	0	0	0	0	0	0	0	0	0	0	0	0	0	0	0	0	0	0	0	0	0	0	0	0	0	0	0	0	0	0	0	0	0	0	0	0	0	0	0	0	0	0	0	0	0	0	0	0	0
36	0	0	0	0	0	0	0	0	0	0	0	0	0	0	0	0	0	0	0	0	0	0	0	0	0	0	0	0	0	0	0	0	0	0	0	0	0	0	0	0	0	0	0	0	0	0	0	0	0
37	0	0	0	0	0	0	0	0	0	0	0	0	0	0	0	0	0	0	0	0	0	0	0	0	0	0	0	0	0	0	0	0	0	0	0	0	0	0	0	0	0	0	0	0	0	0	0	0	0
38	0	0	0	0	0	0	0	0	0	0	0	0	0	0	0	0	0	0	0	0	0	0	0	0	0	0	0	0	0	0	0	0	0	0	0	0	0	0	0	0	0	0	0	0	0	0	0	0	0
39	0	0	0	0	0	0	0	0	0	0	0	0	0	0	0	0	0	0	0	0	0	0	0	0	0	0	0	0	0	0	0	0	0	0	0	0	0	0	0	0	0	0	0	0	0	0	0	0	0
40	0	0	0	0	0	0	0	0	0	0	0	0	0	0	0	0	0	0	0	0	0	0	0	0	0	0	0	0	0	0	0	0	0	0	0	0	0	0	0	0	0	0	0	0	0	0	0	0	0
41	0	0	0	0	0	0	0	0	0	0	0	0	0	0	0	0	0	0	0	0	0	0	0	0	0	0	0	0	0	0	0	0	0	0	0	0	0	0	0	0	0	0	0	0	0	0	0	0	0
42	0	0	0	0	0	0	0	0	0	0	0	0	0	0	0	0	0	0	0	0	0	0	0	0	0	0	0	0	0	0	0	0	0	0	0	0	0	0	0	0	0	0	0	0	0	0	0	0	0
43	0	0	0	0	0	0	0	0	0	0	0	0	0	0	0	0	0	0	0	0	0	0	0	0	0	0	0	0	0	0	0	0	0	0	0	0	0	0	0	0	0	0	0	0	0	0	0	0	0
44	0	0	0	0	0	0	0	0	0	0	0	0	0	0	0	0	0	0	0	0	0	0	0	0	0	0	0	0	0	0	0	0	0	0	0	0	0	0	0	0	0	0	0	0	0	0	0	0	0
45	0	0	0	0	0	0	0	0	0	0	0	0	0	0	0	0	0	0	0	0	0	0	0	0	0	0	0	0	0	0	0	0	0	0	0	0	0	0	0	0	0	0	0	0	0	0	0	0	0
46	0	0	0	0	0	0	0	0	0	0	0	0	0	0	0	0	0	0	0	0	0	0	0	0	0	0	0	0	0	0	0	0	0	0	0	0	0	0	0	0	0	0	0	0	0	0	0	0	0
47	0	0	0	0	0	0	0	0	0	0	0	0	0	0	0	0	0	0	0	0	0	0	0	0	0	0	0	0	0	0	0	0	0	0	0	0	0	0	0	0	0	0	0	0	0	0	0	0	0
48	0	0	0	0	0	0	0	0	0	0	0	0	0	0	0	0	0	0	0	0	0	0	0	0	0	0	0	0	0	0	0	0	0	0	0	0	0	0	0	0	0	0	0	0	0	0	0	0	0
49	0	0	0	0	0	0	0	0	0	0	0	0	0	0	0	0	0	0	0	0	0	0	0	0	0	0	0	0	0	0	0	0	0	0	0	0	0	0	0	0	0	0	0	0	0	0	0	0	0
50	0	0	0	0	0	0	0	0	0	0	0	0	0	0	0	0	0	0	0	0	0	0	0	0	0	0	0	0	0	0	0	0	0	0	0	0	0	0	0	0	0	0	0	0	0	0	0	0	0
51	0	0	0	0	0	0	0	0	0	0	0	0	0	0	0	0	0	0	0	0	0	0	0	0	0	0	0	0	0	0	0	0	0	0	0	0	0	0	0	0	0	0	0	0	0	0	0	0	0
52	0	0	0	0	0	0	0	0	0	0	0	0	0	0	0	0	0	0	0	0	0	0	0	0	0	0	0	0	0	0	0	0	0	0	0	0	0	0	0	0	0	0	0	0	0	0	0	0	0
53	0	0	0	0	0	0	0	0	0	0	0	0	0	0	0	0	0	0	0	0	0	0	0	0	0	0	0	0	0	0	0	0	0	0	0	0	0	0	0	0	0	0	0	0	0	0	0	0	0
54	0	0	0	0	0	0	0	0	0	0	0	0	0	0	0	0	0	0	0	0	0	0	0	0	0	0	0	0	0	0	0	0	0	0	0	0	0	0	0	0	0	0	0	0	0	0	0	0	0
55	0	0	0	0	0	0	0	0	0	0	0	0	0	0	0	0	0	0	0	0	0	0	0	0	0	0	0	0	0	0	0	0	0	0	0	0	0	0	0	0	0	0	0	0	0	0	0	0	0
56	0	0	0	0	0	0	0	0	0	0	0	0	0	0	0	0	0	0	0	0	0	0	0	0	0	0	0	0	0	0	0	0	0	0	0	0	0	0	0	0	0	0	0	0	0	0	0	0	0
57	0	0	0	0	0	0	0	0	0	0	0	0	0	0	0	0	0	0	0	0	0	0	0	0	0	0	0	0	0	0	0	0	0	0	0	0	0	0	0	0	0	0	0	0	0	0	0	0	0
58	0	0	0	0	0	0	0	0	0	0	0	0	0	0	0	0	0	0	0	0	0	0	0	0	0	0	0	0	0	0	0	0	0	0	0	0	0	0	0	0	0	0	0	0	0	0	0	0	0
59	0	0	0	0	0	0	0	0	0	0	0	0	0	0	0	0	0	0	0	0	0	0	0	0	0	0	0	0	0	0	0	0	0	0	0	0	0	0	0	0	0	0	0	0	0	0	0	0	0
60	0	0	0	0	0	0	0	0	0	0	0	0	0	0	0	0	0	0	0	0	0	0	0	0	0	0	0	0	0	0	0	0	0	0	0	0	0	0	0	0	0	0	0	0	0	0	0	0	0
61	0	0	0	0	0	0	0	0	0	0	0	0	0	0	0	0	0	0	0	0	0	0	0	0	0	0	0	0	0	0	0	0	0	0	0	0	0	0	0	0	0	0	0	0	0	0	0	0	0
62	0	0	0	0	0	0	0	0	0	0	0	0	0	0	0	0	0	0	0	0	0	0	0	0	0	0	0	0	0	0	0	0	0	0	0	0	0	0	0	0	0	0	0	0	0	0	0	0	0
63	0	0	0	0	0	0	0	0	0	0	0	0	0	0	0	0	0	0	0	0	0	0	0	0	0	0	0	0	0	0	0	0	0	0	0	0	0	0	0	0	0	0	0	0	0	0	0	0	0
64	0	0	0	0	0	0	0	0	0	0	0	0	0	0	0	0	0	0	0	0	0	0	0	0	0	0	0	0	0	0	0	0	0	0	0	0	0	0	0	0	0	0	0	0	0	0	0	0	0
65	0	0	0	0	0	0	0	0	0	0	0	0	0	0	0	0	0	0	0	0	0	0	0	0	0	0	0	0	0	0	0	0	0	0	0	0	0	0	0	0	0	0	0	0	0	0	0	0	0
66	0	0	0	0	0	0	0	0	0	0	0	0	0	0	0	0	0	0	0	0	0	0	0	0	0	0	0	0	0	0	0	0	0	0	0	0	0	0	0	0	0	0	0	0	0	0	0	0	0
67	0	0	0	0	0	0	0	0	0	0	0	0	0	0	0	0	0	0	0	0	0	0	0	0	0	0	0	0	0	0	0	0	0	0	0	0	0	0	0	0	0	0	0	0	0	0	0	0	0
68	0	0	0	0	0	0	0	0	0	0	0	0	0	0	0	0	0	0	0	0	0	0	0	0	0	0	0	0	0	0	0	0	0	0	0	0	0	0	0	0	0	0	0	0	0	0	0	0	0
69	0	0	0	0	0	0	0	0	0	0	0	0	0	0	0	0	0	0	0	0	0	0	0	0	0	0	0	0	0	0	0	0	0	0	0	0	0	0	0	0	0	0	0	0	0	0	0	0	0
70	0	0	0	0	0	0	0	0	0	0	0	0	0	0	0	0	0	0	0	0	0	0	0	0	0	0	0	0	0	0	0	0	0	0	0	0	0	0	0	0	0	0	0	0	0	0	0	0	0
71	0	0	0	0	0	0	0	0	0	0	0	0	0	0	0	0	0	0	0	0	0	0	0	0	0	0	0	0	0	0	0	0	0	0	0	0	0	0	0	0	0	0	0	0	0	0	0	0	0
72	0	0	0	0	0	0	0	0	0	0	0	0	0	0	0	0	0	0	0	0	0	0	0	0	0	0	0	0	0	0	0	0	0	0	0	0	0	0	0	0	0	0	0	0	0	0	0	0	0
73	0	0	0	0	0	0	0	0	0	0	0	0	0	0	0	0	0	0	0	0	0	0	0	0	0	0	0	0	0	0	0	0	0	0	0	0	0	0	0	0	0	0	0	0	0	0	0	0	0
74	0	0	0	0	0	0	0	0	0	0	0	0	0	0	0	0	0	0	0	0	0	0	0	0	0	0	0	0	0	0	0	0	0	0	0	0	0	0	0	0	0	0	0	0	0	0	0	0	0
75	0	0	0	0	0	0	0	0	0	0	0	0	0	0	0	0	0	0	0	0	0	0	0	0	0	0	0	0	0	0	0	0	0	0	0	0	0	0	0	0	0	0	0	0	0	0	0	0	0
76	0	0	0	0	0	0	0	0	0	0	0	0	0	0	0	0	0	0	0	0	0	0	0	0	0	0	0	0	0	0	0	0	0	0	0	0	0	0	0	0	0	0	0	0	0	0	0	0	0
77	0	0	0	0	0	0	0	0	0	0	0	0	0	0	0	0	0	0	0	0	0	0	0	0	0	0	0	0	0	0	0	0	0	0	0	0	0	0	0	0	0	0	0	0	0	0	0	0	0
78	0	0	0	0	0	0	0	0	0	0	0	0	0	0	0	0	0	0	0	0	0	0	0	0	0	0	0	0	0	0	0	0	0	0	0	0	0	0	0	0	0	0	0	0	0	0	0	0	0
79	0	0	0	0	0	0	0	0	0	0	0	0	0	0	0	0	0	0	0	0	0	0	0	0	0	0	0	0	0	0	0	0	0	0	0	0	0	0	0	0	0	0	0	0	0	0	0	0	0
80	0	0	0	0	0	0	0	0	0	0	0	0	0	0	0	0	0	0	0	0	0	0	0	0	0	0	0	0	0	0	0	0	0	0	0	0	0	0	0	0	0	0	0	0	0	0	0	0	0
81	0	0	0	0	0	0	0	0	0	0	0	0	0	0	0	0	0	0	0	0	0	0	0	0	0	0	0	0	0	0	0	0	0	0	0	0	0	0	0	0	0	0	0	0	0	0	0	0	0
82	0	0	0	0	0	0	0	0	0	0	0	0	0	0	0	0	0	0	0	0	0	0	0	0	0	0	0	0	0	0	0	0	0	0	0	0	0	0	0	0	0	0	0	0	0	0	0	0	0
83	0	0	0	0	0	0	0	0	0	0	0	0	0	0	0	0	0	0	0	0	0	0	0	0	0	0	0	0	0	0	0	0	0	0	0	0	0	0	0	0	0	0	0	0	0	0	0	0	0
84	0	0	0	0	0	0	0	0	0	0	0	0	0	0	0	0	0	0	0	0	0	0	0	0	0	0	0	0	0	0	0	0	0	0	0	0	0	0	0	0	0	0	0	0	0	0	0	0	0
85	0	0	0	0	0	0	0	0	0	0	0	0	0	0	0	0	0	0	0	0	0	0	0	0	0	0	0	0	0	0	0	0	0	0	0	0	0	0	0	0	0	0	0	0	0	0	0	0	0
86	0	0	0	0	0	0	0	0	0	0	0	0	0	0	0	0	0	0	0	0	0	0	0	0	0	0	0	0	0	0	0	0	0	0	0	0	0	0	0	0	0	0	0	0	0	0	0	0	0
87	0	0	0	0	0	0	0	0	0	0	0	0	0	0	0	0	0	0	0	0	0	0	0	0	0	0	0	0	0	0	0	0	0	0	0	0	0	0	0	0	0	0	0	0	0	0	0	0	0
88	0	0	0	0	0	0	0	0	0	0	0	0	0	0	0	0	0	0	0	0	0	0	0	0	0	0	0	0	0	0	0	0	0	0	0	0	0	0	0	0	0	0	0	0	0	0	0	0	0
89	0	0	0	0	0	0	0	0	0	0	0	0	0	0	0	0	0	0	0	0	0	0	0	0	0	0	0	0	0	0	0	0	0	0	0	0	0	0	0	0	0	0	0	0	0	0	0	0	0
90	0	0	0	0	0	0	0	0	0	0	0	0	0	0	0	0	0	0	0	0	0	0	0	0	0	0	0	0	0	0	0	0	0	0	0	0	0	0	0	0	0	0	0	0	0	0	0	0	0
91	0	0	0	0	0	0	0	0	0	0	0	0	0	0	0	0	0	0	0	0	0	0	0	0	0	0	0	0	0	0	0	0	0	0	0	0	0	0	0	0	0	0	0	0	0	0	0	0	0
92	0	0	0	0	0	0	0	0	0	0	0	0	0	0	0	0	0	0	0	0	0	0	0	0	0	0	0	0	0	0	0	0	0	0	0	0	0	0	0	0	0	0	0	0	0	0	0	0	0
93	0	0	0	0	0	0	0	0	0	0	0	0	0	0	0	0	0	0	0	0	0	0	0	0	0	0	0	0	0	0	0	0	0	0	0	0	0	0	0	0	0	0	0	0	0	0	0	0	0
94	0	0	0	0	0	0	0	0	0	0	0	0	0	0	0	0	0	0	0	0	0	0	0	0	0	0	0	0	0	0	0	0	0	0	0	0	0	0	0	0	0	0	0	0	0	0	0	0	0
95	0	0	0	0	0	0	0	0	0	0	0	0	0	0	0	0	0	0	0	0	0	0	0	0	0	0	0	0	0	0	0	0	0	0	0	0	0	0	0	0	0	0	0	0	0	0	0	0	0
96	0	0	0	0	0	0	0	0	0	0	0	0	0	0	0	0	0	0	0	0	0	0	0	0	0	0	0	0	0	0	0	0	0	0	0	0	0	0	0	0	0	0	0	0	0	0	0	0	0
97	0	0	0	0	0	0	0	0	0	0	0	0	0	0	0	0	0	0	0	0	0	0	0	0	0	0	0	0	0	0	0	0	0	0	0	0	0	0	0	0	0	0	0	0	0	0	0	0	0
98	0	0	0	0	0	0	0	0	0	0	0	0	0	0	0	0	0	0	0	0	0	0	0	0	0	0	0	0	0	0	0	0	0	0	0	0	0	0	0	0	0	0	0	0	0	0	0	0	0
99	0	0	0	0	0	0	0	0	0	0	0	0	0	0	0	0	0	0	0	0	0	0	0	0	0	0	0	0	0	0	0	0	0	0	0	0	0	0	0	0	0	0	0	0	0	0	0	0	0
	C1
	0	1	2	3	4	5	6	7	8	9	10	11	12	13	14	15	16	17	18	19	20	21	22	23	24	25	26	27	28	29	30	31	32	33	34	35	36	37	38	39	40	41	42	43	44	45	46	47	48
	IL6	IL6ST	STAT3	EGFR	CRP	IL17A	POU2F1	RORA	POMC	SERPINA3	IL1B	AKT	INS	ADIPOQ	ERK	PI3K	MAPK14	MAPK3	HCK	TNF	MAPK1	IKBKB	PTGS2	IKBKG	RIPK1	IL18	CXCL12	CCL2	CD40LG	CD14	AGT	TRAF2	IFNG	TLR2	TGFA	PTEN	CD40	TIMP3	MAP3K1	STAT1	NOS3	ERBB2	TNFRSF1A	RIPK2	CHUK	AKT2	XDH	TNFRSF1B	NFKBIA
State Constraint	0	0	0	0	0	0	0	0	0	0	0	0	0	0	0	0	0	0	0	0	0	0	0	0	0	0	0	0	0	0	0	0	0	0	0	0	0	0	0	0	0	0	0	0	0	0	0	0	0
state=0	100	100	100	100	100	100	100	100	100	100	100	100	100	100	100	100	100	100	100	100	100	100	100	100	100	100	100	100	100	100	100	100	100	100	100	100	100	100	100	100	100	100	100	100	100	100	100	100	100
state=1	0	0	0	0	0	0	0	0	0	0	0	0	0	0	0	0	0	0	0	0	0	0	0	0	0	0	0	0	0	0	0	0	0	0	0	0	0	0	0	0	0	0	0	0	0	0	0	0	0
state=2	0	0	0	0	0	0	0	0	0	0	0	0	0	0	0	0	0	0	0	0	0	0	0	0	0	0	0	0	0	0	0	0	0	0	0	0	0	0	0	0	0	0	0	0	0	0	0	0	0
[truncated: 141 more columns]

## Sheet: Table S4
Table S4. Extent of deviation from steady state in a sample of 100 competing models satisfying all 3 steady state conditions within a 5% tolerance (6 bits across 63 state variables)
	Deviations from stable steady state (bits)
Constraint	C1
State Variable Index	0	1	2	3	4	5	6	7	8	9	10	11	12	13	14	15	16	17	18	19	20	21	22	23	24	25	26	27	28	29	30	31	32	33	34	35	36	37	38	39	40	41	42	43	44	45	46	47	48
Stae variable Name	IL6	IL6ST	STAT3	EGFR	CRP	IL17A	POU2F1	RORA	POMC	SERPINA3	IL1B	AKT	INS	ADIPOQ	ERK	PI3K	MAPK14	MAPK3	HCK	TNF	MAPK1	IKBKB	PTGS2	IKBKG	RIPK1	IL18	CXCL12	CCL2	CD40LG	CD14	AGT	TRAF2	IFNG	TLR2	TGFA	PTEN	CD40	TIMP3	MAP3K1	STAT1	NOS3	ERBB2	TNFRSF1A	RIPK2	CHUK	AKT2	XDH	TNFRSF1B	NFKBIA
Model index
0	0	0	0	0	0	0	0	0	0	0	0	0	0	0	0	0	0	0	0	0	0	0	0	0	0	0	0	0	0	0	0	0	0	0	0	0	0	0	0	0	0	0	0	0	0	0	0	0	0
1	0	0	0	0	0	0	0	0	0	0	0	0	0	0	0	0	0	0	0	0	0	0	0	0	0	0	0	0	0	0	0	0	0	0	0	0	0	0	0	0	0	0	0	0	0	0	0	0	0
2	0	0	0	0	0	0	0	0	0	0	0	0	0	0	0	0	0	0	0	0	0	0	0	0	0	0	0	0	0	0	0	0	0	0	0	0	0	0	0	0	0	0	0	0	0	0	0	0	0
3	0	0	0	0	0	0	0	0	0	0	0	0	0	0	0	0	0	0	0	0	0	0	0	0	0	0	0	0	0	0	0	0	0	0	0	0	0	0	0	0	0	0	0	0	0	0	0	0	0
4	0	0	0	0	0	0	0	0	0	0	0	0	0	0	0	0	0	0	0	0	0	0	0	0	0	0	0	0	0	0	0	0	0	0	0	0	0	0	0	0	0	0	0	0	0	0	0	0	0
5	0	0	0	0	0	0	0	0	0	0	0	0	0	0	0	0	0	0	0	0	0	0	0	0	0	0	0	0	0	0	0	0	0	0	0	0	0	0	0	0	0	0	0	0	0	0	0	0	0
6	0	0	0	0	0	0	0	0	0	0	0	0	0	0	0	0	0	0	0	0	0	0	0	0	0	0	0	0	0	0	0	0	0	0	0	0	0	0	0	0	0	0	0	0	0	0	0	0	0
7	0	0	0	0	0	0	0	0	0	0	0	0	0	0	0	0	0	0	0	0	0	0	0	0	0	0	0	0	0	0	0	0	0	0	0	0	0	0	0	0	0	0	0	0	0	0	0	0	0
8	0	0	0	0	0	0	0	0	0	0	0	0	0	0	0	0	0	0	0	0	0	0	0	0	0	0	0	0	0	0	0	0	0	0	0	0	0	0	0	0	0	0	0	0	0	0	0	0	0
9	0	0	0	0	0	0	0	0	0	0	0	0	0	0	0	0	0	0	0	0	0	0	0	0	0	0	0	0	0	0	0	0	0	0	0	0	0	0	0	0	0	0	0	0	0	0	0	0	0
10	0	0	0	0	0	0	0	0	0	0	0	0	0	0	0	0	0	0	0	0	0	0	0	0	0	0	0	0	0	0	0	0	0	0	0	0	0	0	0	0	0	0	0	0	0	0	0	0	0
11	0	0	0	0	0	0	0	0	0	0	0	0	0	0	0	0	0	0	0	0	0	0	0	0	0	0	0	0	0	0	0	0	0	0	0	0	0	0	0	0	0	0	0	0	0	0	0	0	0
12	0	0	0	0	0	0	0	0	0	0	0	0	0	0	0	0	0	0	0	0	0	0	0	0	0	0	0	0	0	0	0	0	0	0	0	0	0	0	0	0	0	0	0	0	0	0	0	0	0
13	0	0	0	0	0	0	0	0	0	0	0	0	0	0	0	0	0	0	0	0	0	0	0	0	0	0	0	0	0	0	0	0	0	0	0	0	0	0	0	0	0	0	0	0	0	0	0	0	0
14	0	0	0	0	0	0	0	0	0	0	0	0	0	0	0	0	0	0	0	0	0	0	0	0	0	0	0	0	0	0	0	0	0	0	0	0	0	0	0	0	0	0	0	0	0	0	0	0	0
15	0	0	0	0	0	0	0	0	0	0	0	0	0	0	0	0	0	0	0	0	0	0	0	0	0	0	0	0	0	0	0	0	0	0	0	0	0	0	0	0	0	0	0	0	0	0	0	0	0
16	0	0	0	0	0	0	0	0	0	0	0	0	0	0	0	0	0	0	0	0	0	0	0	0	0	0	0	0	0	0	0	0	0	0	0	0	0	0	0	0	0	0	0	0	0	0	0	0	0
17	0	0	0	0	0	0	0	0	0	0	0	0	0	0	0	0	0	0	0	0	0	0	0	0	0	0	0	0	0	0	0	0	0	0	0	0	0	0	0	0	0	0	0	0	0	0	0	0	0
18	0	0	0	0	0	0	0	0	0	0	0	0	0	0	0	0	0	0	0	0	0	0	0	0	0	0	0	0	0	0	0	0	0	0	0	0	0	0	0	0	0	0	0	0	0	0	0	0	0
19	0	0	0	0	0	0	0	0	0	0	0	0	0	0	0	0	0	0	0	0	0	0	0	0	0	0	0	0	0	0	0	0	0	0	0	0	0	0	0	0	0	0	0	0	0	0	0	0	0
20	0	0	0	0	0	0	0	0	0	0	0	0	0	0	0	0	0	0	0	0	0	0	0	0	0	0	0	0	0	0	0	0	0	0	0	0	0	0	0	0	0	0	0	0	0	0	0	0	0
21	0	0	0	0	0	0	0	0	0	0	0	0	0	0	0	0	0	0	0	0	0	0	0	0	0	0	0	0	0	0	0	0	0	0	0	0	0	0	0	0	0	0	0	0	0	0	0	0	0
22	0	0	0	0	0	0	0	0	0	0	0	0	0	0	0	0	0	0	0	0	0	0	0	0	0	0	0	0	0	0	0	0	0	0	0	0	0	0	0	0	0	0	0	0	0	0	0	0	0
23	0	0	0	0	0	0	0	0	0	0	0	0	0	0	0	0	0	0	0	0	0	0	0	0	0	0	0	0	0	0	0	0	0	0	0	0	0	0	0	0	0	0	0	0	0	0	0	0	0
24	0	0	0	0	0	0	0	0	0	0	0	0	0	0	0	0	0	0	0	0	0	0	0	0	0	0	0	0	0	0	0	0	0	0	0	0	0	0	0	0	0	0	0	0	0	0	0	0	0
25	0	0	0	0	0	0	0	0	0	0	0	0	0	0	0	0	0	0	0	0	0	0	0	0	0	0	0	0	0	0	0	0	0	0	0	0	0	0	0	0	0	0	0	0	0	0	0	0	0
26	0	0	0	0	0	0	0	0	0	0	0	0	0	0	0	0	0	0	0	0	0	0	0	0	0	0	0	0	0	0	0	0	0	0	0	0	0	0	0	0	0	0	0	0	0	0	0	0	0
27	0	0	0	0	0	0	0	0	0	0	0	0	0	0	0	0	0	0	0	0	0	0	0	0	0	0	0	0	0	0	0	0	0	0	0	0	0	0	0	0	0	0	0	0	0	0	0	0	0
28	0	0	0	0	0	0	0	0	0	0	0	0	0	0	0	0	0	0	0	0	0	0	0	0	0	0	0	0	0	0	0	0	0	0	0	0	0	0	0	0	0	0	0	0	0	0	0	0	0
29	0	0	0	0	0	0	0	0	0	0	0	0	0	0	0	0	0	0	0	0	0	0	0	0	0	0	0	0	0	0	0	0	0	0	0	0	0	0	0	0	0	0	0	0	0	0	0	0	0
30	0	0	0	0	0	0	0	0	0	0	0	0	0	0	0	0	0	0	0	0	0	0	0	0	0	0	0	0	0	0	0	0	0	0	0	0	0	0	0	0	0	0	0	0	0	0	0	0	0
31	0	0	0	0	0	0	0	0	0	0	0	0	0	0	0	0	0	0	0	0	0	0	0	0	0	0	0	0	0	0	0	0	0	0	0	0	0	0	0	0	0	0	0	0	0	0	0	0	0
32	0	0	0	0	0	0	0	0	0	0	0	0	0	0	0	0	0	0	0	0	0	0	0	0	0	0	0	0	0	0	0	0	0	0	0	0	0	0	0	0	0	0	0	0	0	0	0	0	0
33	0	0	0	0	0	0	0	0	0	0	0	0	0	0	0	0	0	0	0	0	0	0	0	0	0	0	0	0	0	0	0	0	0	0	0	0	0	0	0	0	0	0	0	0	0	0	0	0	0
34	0	0	0	0	0	0	0	0	0	0	0	0	0	0	0	0	0	0	0	0	0	0	0	0	0	0	0	0	0	0	0	0	0	0	0	0	0	0	0	0	0	0	0	0	0	0	0	0	0
35	0	0	0	0	0	0	0	0	0	0	0	0	0	0	0	0	0	0	0	0	0	0	0	0	0	0	0	0	0	0	0	0	0	0	0	0	0	0	0	0	0	0	0	0	0	0	0	0	0
36	0	0	0	0	0	0	0	0	0	0	0	0	0	0	0	0	0	0	0	0	0	0	0	0	0	0	0	0	0	0	0	0	0	0	0	0	0	0	0	0	0	0	0	0	0	0	0	0	0
37	0	0	0	0	0	0	0	0	0	0	0	0	0	0	0	0	0	0	0	0	0	0	0	0	0	0	0	0	0	0	0	0	0	0	0	0	0	0	0	0	0	0	0	0	0	0	0	0	0
38	0	0	0	0	0	0	0	0	0	0	0	0	0	0	0	0	0	0	0	0	0	0	0	0	0	0	0	0	0	0	0	0	0	0	0	0	0	0	0	0	0	0	0	0	0	0	0	0	0
39	0	0	0	0	0	0	0	0	0	0	0	0	0	0	0	0	0	0	0	0	0	0	0	0	0	0	0	0	0	0	0	0	0	0	0	0	0	0	0	0	0	0	0	0	0	0	0	0	0
40	0	0	0	0	0	0	0	0	0	0	0	0	0	0	0	0	0	0	0	0	0	0	0	0	0	0	0	0	0	0	0	0	0	0	0	0	0	0	0	0	0	0	0	0	0	0	0	0	0
41	0	0	0	0	0	0	0	0	0	0	0	0	0	0	0	0	0	0	0	0	0	0	0	0	0	0	0	0	0	0	0	0	0	0	0	0	0	0	0	0	0	0	0	0	0	0	0	0	0
42	0	0	0	0	0	0	0	0	0	0	0	0	0	0	0	0	0	0	0	0	0	0	0	0	0	0	0	0	0	0	0	0	0	0	0	0	0	0	0	0	0	0	0	0	0	0	0	0	0
43	0	0	0	0	0	0	0	0	0	0	0	0	0	0	0	0	0	0	0	0	0	0	0	0	0	0	0	0	0	0	0	0	0	0	0	0	0	0	0	0	0	0	0	0	0	0	0	0	0
44	0	0	0	0	0	0	0	0	0	0	0	0	0	0	0	0	0	0	0	0	0	0	0	0	0	0	0	0	0	0	0	0	0	0	0	0	0	0	0	0	0	0	0	0	0	0	0	0	0
45	0	0	0	0	0	0	0	0	0	0	0	0	0	0	0	0	0	0	0	0	0	0	0	0	0	0	0	0	0	0	0	0	0	0	0	0	0	0	0	0	0	0	0	0	0	0	0	0	0
46	0	0	0	0	0	0	0	0	0	0	0	0	0	0	0	0	0	0	0	0	0	0	0	0	0	0	0	0	0	0	0	0	0	0	0	0	0	0	0	0	0	0	0	0	0	0	0	0	0
47	0	0	0	0	0	0	0	0	0	0	0	0	0	0	0	0	0	0	0	0	0	0	0	0	0	0	0	0	0	0	0	0	0	0	0	0	0	0	0	0	0	0	0	0	0	0	0	0	0
48	0	0	0	0	0	0	0	0	0	0	0	0	0	0	0	0	0	0	0	0	0	0	0	0	0	0	0	0	0	0	0	0	0	0	0	0	0	0	0	0	0	0	0	0	0	0	0	0	0
49	0	0	0	0	0	0	0	0	0	0	0	0	0	0	0	0	0	0	0	0	0	0	0	0	0	0	0	0	0	0	0	0	0	0	0	0	0	0	0	0	0	0	0	0	0	0	0	0	0
50	0	0	0	0	0	0	0	0	0	0	0	0	0	0	0	0	0	0	0	0	0	0	0	0	0	0	0	0	0	0	0	0	0	0	0	0	0	0	0	0	0	0	0	0	0	0	0	0	0
51	0	0	0	0	0	0	0	0	0	0	0	0	0	0	0	0	0	0	0	0	0	0	0	0	0	0	0	0	0	0	0	0	0	0	0	0	0	0	0	0	0	0	0	0	0	0	0	0	0
52	0	0	0	0	0	0	0	0	0	0	0	0	0	0	0	0	0	0	0	0	0	0	0	0	0	0	0	0	0	0	0	0	0	0	0	0	0	0	0	0	0	0	0	0	0	0	0	0	0
53	0	0	0	0	0	0	0	0	0	0	0	0	0	0	0	0	0	0	0	0	0	0	0	0	0	0	0	0	0	0	0	0	0	0	0	0	0	0	0	0	0	0	0	0	0	0	0	0	0
54	0	0	0	0	0	0	0	0	0	0	0	0	0	0	0	0	0	0	0	0	0	0	0	0	0	0	0	0	0	0	0	0	0	0	0	0	0	0	0	0	0	0	0	0	0	0	0	0	0
55	0	0	0	0	0	0	0	0	0	0	0	0	0	0	0	0	0	0	0	0	0	0	0	0	0	0	0	0	0	0	0	0	0	0	0	0	0	0	0	0	0	0	0	0	0	0	0	0	0
56	0	0	0	0	0	0	0	0	0	0	0	0	0	0	0	0	0	0	0	0	0	0	0	0	0	0	0	0	0	0	0	0	0	0	0	0	0	0	0	0	0	0	0	0	0	0	0	0	0
57	0	0	0	0	0	0	0	0	0	0	0	0	0	0	0	0	0	0	0	0	0	0	0	0	0	0	0	0	0	0	0	0	0	0	0	0	0	0	0	0	0	0	0	0	0	0	0	0	0
58	0	0	0	0	0	0	0	0	0	0	0	0	0	0	0	0	0	0	0	0	0	0	0	0	0	0	0	0	0	0	0	0	0	0	0	0	0	0	0	0	0	0	0	0	0	0	0	0	0
59	0	0	0	0	0	0	0	0	0	0	0	0	0	0	0	0	0	0	0	0	0	0	0	0	0	0	0	0	0	0	0	0	0	0	0	0	0	0	0	0	0	0	0	0	0	0	0	0	0
60	0	0	0	0	0	0	0	0	0	0	0	0	0	0	0	0	0	0	0	0	0	0	0	0	0	0	0	0	0	0	0	0	0	0	0	0	0	0	0	0	0	0	0	0	0	0	0	0	0
61	0	0	0	0	0	0	0	0	0	0	0	0	0	0	0	0	0	0	0	0	0	0	0	0	0	0	0	0	0	0	0	0	0	0	0	0	0	0	0	0	0	0	0	0	0	0	0	0	0
62	0	0	0	0	0	0	0	0	0	0	0	0	0	0	0	0	0	0	0	0	0	0	0	0	0	0	0	0	0	0	0	0	0	0	0	0	0	0	0	0	0	0	0	0	0	0	0	0	0
63	0	0	0	0	0	0	0	0	0	0	0	0	0	0	0	0	0	0	0	0	0	0	0	0	0	0	0	0	0	0	0	0	0	0	0	0	0	0	0	0	0	0	0	0	0	0	0	0	0
64	0	0	0	0	0	0	0	0	0	0	0	0	0	0	0	0	0	0	0	0	0	0	0	0	0	0	0	0	0	0	0	0	0	0	0	0	0	0	0	0	0	0	0	0	0	0	0	0	0
65	0	0	0	0	0	0	0	0	0	0	0	0	0	0	0	0	0	0	0	0	0	0	0	0	0	0	0	0	0	0	0	0	0	0	0	0	0	0	0	0	0	0	0	0	0	0	0	0	0
66	0	0	0	0	0	0	0	0	0	0	0	0	0	0	0	0	0	0	0	0	0	0	0	0	0	0	0	0	0	0	0	0	0	0	0	0	0	0	0	0	0	0	0	0	0	0	0	0	0
67	0	0	0	0	0	0	0	0	0	0	0	0	0	0	0	0	0	0	0	0	0	0	0	0	0	0	0	0	0	0	0	0	0	0	0	0	0	0	0	0	0	0	0	0	0	0	0	0	0
68	0	0	0	0	0	0	0	0	0	0	0	0	0	0	0	0	0	0	0	0	0	0	0	0	0	0	0	0	0	0	0	0	0	0	0	0	0	0	0	0	0	0	0	0	0	0	0	0	0
69	0	0	0	0	0	0	0	0	0	0	0	0	0	0	0	0	0	0	0	0	0	0	0	0	0	0	0	0	0	0	0	0	0	0	0	0	0	0	0	0	0	0	0	0	0	0	0	0	0
70	0	0	0	0	0	0	0	0	0	0	0	0	0	0	0	0	0	0	0	0	0	0	0	0	0	0	0	0	0	0	0	0	0	0	0	0	0	0	0	0	0	0	0	0	0	0	0	0	0
71	0	0	0	0	0	0	0	0	0	0	0	0	0	0	0	0	0	0	0	0	0	0	0	0	0	0	0	0	0	0	0	0	0	0	0	0	0	0	0	0	0	0	0	0	0	0	0	0	0
72	0	0	0	0	0	0	0	0	0	0	0	0	0	0	0	0	0	0	0	0	0	0	0	0	0	0	0	0	0	0	0	0	0	0	0	0	0	0	0	0	0	0	0	0	0	0	0	0	0
73	0	0	0	0	0	0	0	0	0	0	0	0	0	0	0	0	0	0	0	0	0	0	0	0	0	0	0	0	0	0	0	0	0	0	0	0	0	0	0	0	0	0	0	0	0	0	0	0	0
74	0	0	0	0	0	0	0	0	0	0	0	0	0	0	0	0	0	0	0	0	0	0	0	0	0	0	0	0	0	0	0	0	0	0	0	0	0	0	0	0	0	0	0	0	0	0	0	0	0
75	0	0	0	0	0	0	0	0	0	0	0	0	0	0	0	0	0	0	0	0	0	0	0	0	0	0	0	0	0	0	0	0	0	0	0	0	0	0	0	0	0	0	0	0	0	0	0	0	0
76	0	0	0	0	0	0	0	0	0	0	0	0	0	0	0	0	0	0	0	0	0	0	0	0	0	0	0	0	0	0	0	0	0	0	0	0	0	0	0	0	0	0	0	0	0	0	0	0	0
77	0	0	0	0	0	0	0	0	0	0	0	0	0	0	0	0	0	0	0	0	0	0	0	0	0	0	0	0	0	0	0	0	0	0	0	0	0	0	0	0	0	0	0	0	0	0	0	0	0
78	0	0	0	0	0	0	0	0	0	0	0	0	0	0	0	0	0	0	0	0	0	0	0	0	0	0	0	0	0	0	0	0	0	0	0	0	0	0	0	0	0	0	0	0	0	0	0	0	0
79	0	0	0	0	0	0	0	0	0	0	0	0	0	0	0	0	0	0	0	0	0	0	0	0	0	0	0	0	0	0	0	0	0	0	0	0	0	0	0	0	0	0	0	0	0	0	0	0	0
80	0	0	0	0	0	0	0	0	0	0	0	0	0	0	0	0	0	0	0	0	0	0	0	0	0	0	0	0	0	0	0	0	0	0	0	0	0	0	0	0	0	0	0	0	0	0	0	0	0
81	0	0	0	0	0	0	0	0	0	0	0	0	0	0	0	0	0	0	0	0	0	0	0	0	0	0	0	0	0	0	0	0	0	0	0	0	0	0	0	0	0	0	0	0	0	0	0	0	0
82	0	0	0	0	0	0	0	0	0	0	0	0	0	0	0	0	0	0	0	0	0	0	0	0	0	0	0	0	0	0	0	0	0	0	0	0	0	0	0	0	0	0	0	0	0	0	0	0	0
83	0	0	0	0	0	0	0	0	0	0	0	0	0	0	0	0	0	0	0	0	0	0	0	0	0	0	0	0	0	0	0	0	0	0	0	0	0	0	0	0	0	0	0	0	0	0	0	0	0
84	0	0	0	0	0	0	0	0	0	0	0	0	0	0	0	0	0	0	0	0	0	0	0	0	0	0	0	0	0	0	0	0	0	0	0	0	0	0	0	0	0	0	0	0	0	0	0	0	0
85	0	0	0	0	0	0	0	0	0	0	0	0	0	0	0	0	0	0	0	0	0	0	0	0	0	0	0	0	0	0	0	0	0	0	0	0	0	0	0	0	0	0	0	0	0	0	0	0	0
86	0	0	0	0	0	0	0	0	0	0	0	0	0	0	0	0	0	0	0	0	0	0	0	0	0	0	0	0	0	0	0	0	0	0	0	0	0	0	0	0	0	0	0	0	0	0	0	0	0
87	0	0	0	0	0	0	0	0	0	0	0	0	0	0	0	0	0	0	0	0	0	0	0	0	0	0	0	0	0	0	0	0	0	0	0	0	0	0	0	0	0	0	0	0	0	0	0	0	0
88	0	0	0	0	0	0	0	0	0	0	0	0	0	0	0	0	0	0	0	0	0	0	0	0	0	0	0	0	0	0	0	0	0	0	0	0	0	0	0	0	0	0	0	0	0	0	0	0	0
89	0	0	0	0	0	0	0	0	0	0	0	0	0	0	0	0	0	0	0	0	0	0	0	0	0	0	0	0	0	0	0	0	0	0	0	0	0	0	0	0	0	0	0	0	0	0	0	0	0
90	0	0	0	0	0	0	0	0	0	0	0	0	0	0	0	0	0	0	0	0	0	0	0	0	0	0	0	0	0	0	0	0	0	0	0	0	0	0	0	0	0	0	0	0	0	0	0	0	0
91	0	0	0	0	0	0	0	0	0	0	0	0	0	0	0	0	0	0	0	0	0	0	0	0	0	0	0	0	0	0	0	0	0	0	0	0	0	0	0	0	0	0	0	0	0	0	0	0	0
92	0	0	0	0	0	0	0	0	0	0	0	0	0	0	0	0	0	0	0	0	0	0	0	0	0	0	0	0	0	0	0	0	0	0	0	0	0	0	0	0	0	0	0	0	0	0	0	0	0
93	0	0	0	0	0	0	0	0	0	0	0	0	0	0	0	0	0	0	0	0	0	0	0	0	0	0	0	0	0	0	0	0	0	0	0	0	0	0	0	0	0	0	0	0	0	0	0	0	0
94	0	0	0	0	0	0	0	0	0	0	0	0	0	0	0	0	0	0	0	0	0	0	0	0	0	0	0	0	0	0	0	0	0	0	0	0	0	0	0	0	0	0	0	0	0	0	0	0	0
95	0	0	0	0	0	0	0	0	0	0	0	0	0	0	0	0	0	0	0	0	0	0	0	0	0	0	0	0	0	0	0	0	0	0	0	0	0	0	0	0	0	0	0	0	0	0	0	0	0
96	0	0	0	0	0	0	0	0	0	0	0	0	0	0	0	0	0	0	0	0	0	0	0	0	0	0	0	0	0	0	0	0	0	0	0	0	0	0	0	0	0	0	0	0	0	0	0	0	0
97	0	0	0	0	0	0	0	0	0	0	0	0	0	0	0	0	0	0	0	0	0	0	0	0	0	0	0	0	0	0	0	0	0	0	0	0	0	0	0	0	0	0	0	0	0	0	0	0	0
98	0	0	0	0	0	0	0	0	0	0	0	0	0	0	0	0	0	0	0	0	0	0	0	0	0	0	0	0	0	0	0	0	0	0	0	0	0	0	0	0	0	0	0	0	0	0	0	0	0
99	0	0	0	0	0	0	0	0	0	0	0	0	0	0	0	0	0	0	0	0	0	0	0	0	0	0	0	0	0	0	0	0	0	0	0	0	0	0	0	0	0	0	0	0	0	0	0	0	0
	C1
	0	1	2	3	4	5	6	7	8	9	10	11	12	13	14	15	16	17	18	19	20	21	22	23	24	25	26	27	28	29	30	31	32	33	34	35	36	37	38	39	40	41	42	43	44	45	46	47	48
	IL6	IL6ST	STAT3	EGFR	CRP	IL17A	POU2F1	RORA	POMC	SERPINA3	IL1B	AKT	INS	ADIPOQ	ERK	PI3K	MAPK14	MAPK3	HCK	TNF	MAPK1	IKBKB	PTGS2	IKBKG	RIPK1	IL18	CXCL12	CCL2	CD40LG	CD14	AGT	TRAF2	IFNG	TLR2	TGFA	PTEN	CD40	TIMP3	MAP3K1	STAT1	NOS3	ERBB2	TNFRSF1A	RIPK2	CHUK	AKT2	XDH	TNFRSF1B	NFKBIA
steady state deviation=0	100	100	100	100	100	100	100	100	100	100	100	100	100	100	100	100	100	100	100	100	100	100	100	100	100	100	100	100	100	100	100	100	100	100	100	100	100	100	100	100	100	100	100	100	100	100	100	100	100
steady state deviation=1	0	0	0	0	0	0	0	0	0	0	0	0	0	0	0	0	0	0	0	0	0	0	0	0	0	0	0	0	0	0	0	0	0	0	0	0	0	0	0	0	0	0	0	0	0	0	0	0	0
steady state deviation=2	0	0	0	0	0	0	0	0	0	0	0	0	0	0	0	0	0	0	0	0	0	0	0	0	0	0	0	0	0	0	0	0	0	0	0	0	0	0	0	0	0	0	0	0	0	0	0	0	0
	C1 non unanimous steady state	0	state variables
[truncated: 141 more columns]

## Sheet: Table S5
Table S5. Subset of 48 models that exactly satisfy a strongly upregulated steady state for cAMP only from a sample of 100 competing models
	Predicted State
Constraint	C1
State Variable Index	0	1	2	3	4	5	6	7	8	9	10	11	12	13	14	15	16	17	18	19	20	21	22	23	24	25	26	27	28	29	30	31	32	33	34	35	36	37	38	39	40	41	42	43	44	45	46	47	48
Stae variable Name	IL6	IL6ST	STAT3	EGFR	CRP	IL17A	POU2F1	RORA	POMC	SERPINA3	IL1B	AKT	INS	ADIPOQ	ERK	PI3K	MAPK14	MAPK3	HCK	TNF	MAPK1	IKBKB	PTGS2	IKBKG	RIPK1	IL18	CXCL12	CCL2	CD40LG	CD14	AGT	TRAF2	IFNG	TLR2	TGFA	PTEN	CD40	TIMP3	MAP3K1	STAT1	NOS3	ERBB2	TNFRSF1A	RIPK2	CHUK	AKT2	XDH	TNFRSF1B	NFKBIA
Model index
0	0	0	0	0	0	0	0	0	0	0	0	0	0	0	0	0	0	0	0	0	0	0	0	0	0	0	0	0	0	0	0	0	0	0	0	0	0	0	0	0	0	0	0	0	0	0	0	0	0
1	0	0	0	0	0	0	0	0	0	0	0	0	0	0	0	0	0	0	0	0	0	0	0	0	0	0	0	0	0	0	0	0	0	0	0	0	0	0	0	0	0	0	0	0	0	0	0	0	0
2	0	0	0	0	0	0	0	0	0	0	0	0	0	0	0	0	0	0	0	0	0	0	0	0	0	0	0	0	0	0	0	0	0	0	0	0	0	0	0	0	0	0	0	0	0	0	0	0	0
3	0	0	0	0	0	0	0	0	0	0	0	0	0	0	0	0	0	0	0	0	0	0	0	0	0	0	0	0	0	0	0	0	0	0	0	0	0	0	0	0	0	0	0	0	0	0	0	0	0
4	0	0	0	0	0	0	0	0	0	0	0	0	0	0	0	0	0	0	0	0	0	0	0	0	0	0	0	0	0	0	0	0	0	0	0	0	0	0	0	0	0	0	0	0	0	0	0	0	0
5	0	0	0	0	0	0	0	0	0	0	0	0	0	0	0	0	0	0	0	0	0	0	0	0	0	0	0	0	0	0	0	0	0	0	0	0	0	0	0	0	0	0	0	0	0	0	0	0	0
6	0	0	0	0	0	0	0	0	0	0	0	0	0	0	0	0	0	0	0	0	0	0	0	0	0	0	0	0	0	0	0	0	0	0	0	0	0	0	0	0	0	0	0	0	0	0	0	0	0
7	0	0	0	0	0	0	0	0	0	0	0	0	0	0	0	0	0	0	0	0	0	0	0	0	0	0	0	0	0	0	0	0	0	0	0	0	0	0	0	0	0	0	0	0	0	0	0	0	0
8	0	0	0	0	0	0	0	0	0	0	0	0	0	0	0	0	0	0	0	0	0	0	0	0	0	0	0	0	0	0	0	0	0	0	0	0	0	0	0	0	0	0	0	0	0	0	0	0	0
9	0	0	0	0	0	0	0	0	0	0	0	0	0	0	0	0	0	0	0	0	0	0	0	0	0	0	0	0	0	0	0	0	0	0	0	0	0	0	0	0	0	0	0	0	0	0	0	0	0
10	0	0	0	0	0	0	0	0	0	0	0	0	0	0	0	0	0	0	0	0	0	0	0	0	0	0	0	0	0	0	0	0	0	0	0	0	0	0	0	0	0	0	0	0	0	0	0	0	0
11	0	0	0	0	0	0	0	0	0	0	0	0	0	0	0	0	0	0	0	0	0	0	0	0	0	0	0	0	0	0	0	0	0	0	0	0	0	0	0	0	0	0	0	0	0	0	0	0	0
12	0	0	0	0	0	0	0	0	0	0	0	0	0	0	0	0	0	0	0	0	0	0	0	0	0	0	0	0	0	0	0	0	0	0	0	0	0	0	0	0	0	0	0	0	0	0	0	0	0
13	0	0	0	0	0	0	0	0	0	0	0	0	0	0	0	0	0	0	0	0	0	0	0	0	0	0	0	0	0	0	0	0	0	0	0	0	0	0	0	0	0	0	0	0	0	0	0	0	0
14	0	0	0	0	0	0	0	0	0	0	0	0	0	0	0	0	0	0	0	0	0	0	0	0	0	0	0	0	0	0	0	0	0	0	0	0	0	0	0	0	0	0	0	0	0	0	0	0	0
15	0	0	0	0	0	0	0	0	0	0	0	0	0	0	0	0	0	0	0	0	0	0	0	0	0	0	0	0	0	0	0	0	0	0	0	0	0	0	0	0	0	0	0	0	0	0	0	0	0
16	0	0	0	0	0	0	0	0	0	0	0	0	0	0	0	0	0	0	0	0	0	0	0	0	0	0	0	0	0	0	0	0	0	0	0	0	0	0	0	0	0	0	0	0	0	0	0	0	0
17	0	0	0	0	0	0	0	0	0	0	0	0	0	0	0	0	0	0	0	0	0	0	0	0	0	0	0	0	0	0	0	0	0	0	0	0	0	0	0	0	0	0	0	0	0	0	0	0	0
18	0	0	0	0	0	0	0	0	0	0	0	0	0	0	0	0	0	0	0	0	0	0	0	0	0	0	0	0	0	0	0	0	0	0	0	0	0	0	0	0	0	0	0	0	0	0	0	0	0
19	0	0	0	0	0	0	0	0	0	0	0	0	0	0	0	0	0	0	0	0	0	0	0	0	0	0	0	0	0	0	0	0	0	0	0	0	0	0	0	0	0	0	0	0	0	0	0	0	0
20	0	0	0	0	0	0	0	0	0	0	0	0	0	0	0	0	0	0	0	0	0	0	0	0	0	0	0	0	0	0	0	0	0	0	0	0	0	0	0	0	0	0	0	0	0	0	0	0	0
21	0	0	0	0	0	0	0	0	0	0	0	0	0	0	0	0	0	0	0	0	0	0	0	0	0	0	0	0	0	0	0	0	0	0	0	0	0	0	0	0	0	0	0	0	0	0	0	0	0
22	0	0	0	0	0	0	0	0	0	0	0	0	0	0	0	0	0	0	0	0	0	0	0	0	0	0	0	0	0	0	0	0	0	0	0	0	0	0	0	0	0	0	0	0	0	0	0	0	0
23	0	0	0	0	0	0	0	0	0	0	0	0	0	0	0	0	0	0	0	0	0	0	0	0	0	0	0	0	0	0	0	0	0	0	0	0	0	0	0	0	0	0	0	0	0	0	0	0	0
24	0	0	0	0	0	0	0	0	0	0	0	0	0	0	0	0	0	0	0	0	0	0	0	0	0	0	0	0	0	0	0	0	0	0	0	0	0	0	0	0	0	0	0	0	0	0	0	0	0
25	0	0	0	0	0	0	0	0	0	0	0	0	0	0	0	0	0	0	0	0	0	0	0	0	0	0	0	0	0	0	0	0	0	0	0	0	0	0	0	0	0	0	0	0	0	0	0	0	0
26	0	0	0	0	0	0	0	0	0	0	0	0	0	0	0	0	0	0	0	0	0	0	0	0	0	0	0	0	0	0	0	0	0	0	0	0	0	0	0	0	0	0	0	0	0	0	0	0	0
27	0	0	0	0	0	0	0	0	0	0	0	0	0	0	0	0	0	0	0	0	0	0	0	0	0	0	0	0	0	0	0	0	0	0	0	0	0	0	0	0	0	0	0	0	0	0	0	0	0
28	0	0	0	0	0	0	0	0	0	0	0	0	0	0	0	0	0	0	0	0	0	0	0	0	0	0	0	0	0	0	0	0	0	0	0	0	0	0	0	0	0	0	0	0	0	0	0	0	0
29	0	0	0	0	0	0	0	0	0	0	0	0	0	0	0	0	0	0	0	0	0	0	0	0	0	0	0	0	0	0	0	0	0	0	0	0	0	0	0	0	0	0	0	0	0	0	0	0	0
30	0	0	0	0	0	0	0	0	0	0	0	0	0	0	0	0	0	0	0	0	0	0	0	0	0	0	0	0	0	0	0	0	0	0	0	0	0	0	0	0	0	0	0	0	0	0	0	0	0
31	0	0	0	0	0	0	0	0	0	0	0	0	0	0	0	0	0	0	0	0	0	0	0	0	0	0	0	0	0	0	0	0	0	0	0	0	0	0	0	0	0	0	0	0	0	0	0	0	0
32	0	0	0	0	0	0	0	0	0	0	0	0	0	0	0	0	0	0	0	0	0	0	0	0	0	0	0	0	0	0	0	0	0	0	0	0	0	0	0	0	0	0	0	0	0	0	0	0	0
33	0	0	0	0	0	0	0	0	0	0	0	0	0	0	0	0	0	0	0	0	0	0	0	0	0	0	0	0	0	0	0	0	0	0	0	0	0	0	0	0	0	0	0	0	0	0	0	0	0
34	0	0	0	0	0	0	0	0	0	0	0	0	0	0	0	0	0	0	0	0	0	0	0	0	0	0	0	0	0	0	0	0	0	0	0	0	0	0	0	0	0	0	0	0	0	0	0	0	0
35	0	0	0	0	0	0	0	0	0	0	0	0	0	0	0	0	0	0	0	0	0	0	0	0	0	0	0	0	0	0	0	0	0	0	0	0	0	0	0	0	0	0	0	0	0	0	0	0	0
36	0	0	0	0	0	0	0	0	0	0	0	0	0	0	0	0	0	0	0	0	0	0	0	0	0	0	0	0	0	0	0	0	0	0	0	0	0	0	0	0	0	0	0	0	0	0	0	0	0
37	0	0	0	0	0	0	0	0	0	0	0	0	0	0	0	0	0	0	0	0	0	0	0	0	0	0	0	0	0	0	0	0	0	0	0	0	0	0	0	0	0	0	0	0	0	0	0	0	0
38	0	0	0	0	0	0	0	0	0	0	0	0	0	0	0	0	0	0	0	0	0	0	0	0	0	0	0	0	0	0	0	0	0	0	0	0	0	0	0	0	0	0	0	0	0	0	0	0	0
39	0	0	0	0	0	0	0	0	0	0	0	0	0	0	0	0	0	0	0	0	0	0	0	0	0	0	0	0	0	0	0	0	0	0	0	0	0	0	0	0	0	0	0	0	0	0	0	0	0
40	0	0	0	0	0	0	0	0	0	0	0	0	0	0	0	0	0	0	0	0	0	0	0	0	0	0	0	0	0	0	0	0	0	0	0	0	0	0	0	0	0	0	0	0	0	0	0	0	0
42	0	0	0	0	0	0	0	0	0	0	0	0	0	0	0	0	0	0	0	0	0	0	0	0	0	0	0	0	0	0	0	0	0	0	0	0	0	0	0	0	0	0	0	0	0	0	0	0	0
47	0	0	0	0	0	0	0	0	0	0	0	0	0	0	0	0	0	0	0	0	0	0	0	0	0	0	0	0	0	0	0	0	0	0	0	0	0	0	0	0	0	0	0	0	0	0	0	0	0
50	0	0	0	0	0	0	0	0	0	0	0	0	0	0	0	0	0	0	0	0	0	0	0	0	0	0	0	0	0	0	0	0	0	0	0	0	0	0	0	0	0	0	0	0	0	0	0	0	0
51	0	0	0	0	0	0	0	0	0	0	0	0	0	0	0	0	0	0	0	0	0	0	0	0	0	0	0	0	0	0	0	0	0	0	0	0	0	0	0	0	0	0	0	0	0	0	0	0	0
52	0	0	0	0	0	0	0	0	0	0	0	0	0	0	0	0	0	0	0	0	0	0	0	0	0	0	0	0	0	0	0	0	0	0	0	0	0	0	0	0	0	0	0	0	0	0	0	0	0
53	0	0	0	0	0	0	0	0	0	0	0	0	0	0	0	0	0	0	0	0	0	0	0	0	0	0	0	0	0	0	0	0	0	0	0	0	0	0	0	0	0	0	0	0	0	0	0	0	0
55	0	0	0	0	0	0	0	0	0	0	0	0	0	0	0	0	0	0	0	0	0	0	0	0	0	0	0	0	0	0	0	0	0	0	0	0	0	0	0	0	0	0	0	0	0	0	0	0	0
	C1
	0	1	2	3	4	5	6	7	8	9	10	11	12	13	14	15	16	17	18	19	20	21	22	23	24	25	26	27	28	29	30	31	32	33	34	35	36	37	38	39	40	41	42	43	44	45	46	47	48
	IL6	IL6ST	STAT3	EGFR	CRP	IL17A	POU2F1	RORA	POMC	SERPINA3	IL1B	AKT	INS	ADIPOQ	ERK	PI3K	MAPK14	MAPK3	HCK	TNF	MAPK1	IKBKB	PTGS2	IKBKG	RIPK1	IL18	CXCL12	CCL2	CD40LG	CD14	AGT	TRAF2	IFNG	TLR2	TGFA	PTEN	CD40	TIMP3	MAP3K1	STAT1	NOS3	ERBB2	TNFRSF1A	RIPK2	CHUK	AKT2	XDH	TNFRSF1B	NFKBIA
Constraint	0	0	0	0	0	0	0	0	0	0	0	0	0	0	0	0	0	0	0	0	0	0	0	0	0	0	0	0	0	0	0	0	0	0	0	0	0	0	0	0	0	0	0	0	0	0	0	0	0
state=0	48	48	48	48	48	48	48	48	48	48	48	48	48	48	48	48	48	48	48	48	48	48	48	48	48	48	48	48	48	48	48	48	48	48	48	48	48	48	48	48	48	48	48	48	48	48	48	48	48
state=1	0	0	0	0	0	0	0	0	0	0	0	0	0	0	0	0	0	0	0	0	0	0	0	0	0	0	0	0	0	0	0	0	0	0	0	0	0	0	0	0	0	0	0	0	0	0	0	0	0
state=2	0	0	0	0	0	0	0	0	0	0	0	0	0	0	0	0	0	0	0	0	0	0	0	0	0	0	0	0	0	0	0	0	0	0	0	0	0	0	0	0	0	0	0	0	0	0	0	0	0
[truncated: 141 more columns]

## Sheet: Table S6
Table S6. Retention of inferred relationships in subset of 48 models that exactly satisfy a strongly upregulated steady state for cAMP only from a sample of 100 competing models
	index	source	target	polarity	Certainty	Models Retained (0f 48)	Source	Eligible for editiing
	149	CAMP	CRP	1	0.989	0	TLM	Yes			Not eligible for editing
	150	CAMP	NOS3	1	0.935	48	TLM	Yes			Low certainty relationships retained
	151	CAMP	PTGS2	1	0.932	0	TLM	Yes			Not expected by TLM but retained
	152	CAMP	TNF	-1	0.932	43	TLM	Yes			Extracted from text-mined knowledge graph
	153	CAMP	IKBKB	-1	0.847	42	TLM	Yes
	154	CXCL12	CAMP	-1	1	48	TLM	No
	155	ERK	CAMP	-1	1	48	TLM	No
	156	TNF	CAMP	-1	1	48	TLM	No
	157	CAMP	NFKBIA	-1	0.753	0	TLM	Yes
	158	CAMP	TLR3	-1	0.735	0	TLM	Yes
	159	CAMP	TLR9	-1	0.735	0	TLM	Yes
	160	CAMP	STAT3	1	0.626	1	TLM	Yes
	161	CAMP	IFNB1	1	0.623	1	TLM	Yes
	162	ADIPOQ	CAMP	1	0.56	5	TLM	Yes
	163	CAMP	ADIPOQ	1	0.463	48	TLM	Yes
	164	MAPK1	IL1B	1	0.987	0	TLM	Yes
	165	MAPK3	IL1B	1	0.948	0	TLM	Yes
	166	MAPK14	IL1B	1	0.968	48	TLM	Yes
	167	IFNG	IL1B	1	0.967	4	TLM	Yes
	168	PI3K	ERBB2	1	Not expected	2	TLM	Yes
	169	AKT	ERBB2	1	Not expected	46	TLM	Yes
	170	IL1B	INS	1	Not expected	1	TLM	Yes
	171	IL6	INS	1	Not expected	7	TLM	Yes
	172	TNF	INS	1	Not expected	41	TLM	Yes
	173	IL1B	NFKBIA	1	0.58	0	TLM	Yes
	174	TNF	NFKBIA	1	0.648	48	TLM	Yes
	175	IFNG	AGT	-1	0.84	48	TLM	Yes
	176	EGFR	CAMP	1	1	48	Elsevier Knowledge Graph	No
	177	MAPK1	CAMP	1	1	48	Elsevier Knowledge Graph	No

## Sheet: Table S7
Table S7. Simulated response to persistent and pulse perturbation in 48 of 100 competing models supporting cAMP steady state
	Elevated Node	cAMP Behaviour (across all 48 models supporting cAMP elevated steady state)
		Applied t=0:100	Model IDs	Applied t=0:50	Model IDs
	IL6	48 models - elevated		42 models - elevated; drops to 0 4 models - elevated; remains elevated 2 models - elevated; oscillates after t=50
				4 models - elevated; remains elevated	42, 47, 52, 53
				2 models - elevated; oscillates after t=50	50, 55
	IL6ST	43 models - oscillates 4 models - elevated 1 model - stays at 0		42 models - oscillates; drops to 0 4 models - elevated; elevated 1 model - stays at 0; stays at 0 1 model - oscillates; oscillates
		4 models - elevated	42, 47, 52, 53	4 models - elevated; elevated	42, 47, 52, 53
		1 model - stays at 0	51	1 model - stays at 0; stays at 0	51
				1 model - oscillates; oscillates	55
	STAT3	48 models - stays at 0		47 models - stays at 0; stays at 0
				1 model - stays at 0; oscillates	52
	EGFR	48 models - elevated		42 models - elevated; drops to 0
				4 models - remains elevated	42, 47, 52, 53
				2 models - elevated; oscillates	50, 55
4	CRP	44 models - oscillates		41 models- oscillates; drops to 0
		4 models - stays at 0	42, 47, 51 55	4 models - stays at 0; stays at 0	42, 47, 51, 55
				2 models - oscillates; oscillates	50, 52
				1 model - oscillates; elevated	53
5	IL17A	45 models- oscillates		42 models - oscillates; drops to 0
		2 models - elevated	42, 52	2 models - elevated; elevated	42, 52
		1 model - stays at 0	51	2 models - oscillates; oscillates	50, 55
				1 model - stays at 0; stays at 0	51
				1 model - oscillates; elevated	53
6	POU2F1	48 models - stays at 0		48 models - stays at 0; stays at 0
7	RORA	48 models - stays at 0		48 models - stays at 0; stays at 0
8	POMC	48 models - stays at 0		48 models - stays at 0; stays at 0
9	SERPINA3	48 models - stays at 0		48 models - stays at 0; stays at 0
10	IL1B	43 models - stays at 0		42 models - stays at 0; oscillates
		4 models - oscillates	47, 50, 52, 53	2 models - oscillates; drops to 0	47, 53
		1 model -elevated	42	2 models - oscillates; oscillates	50, 52
				1 model - elevated; elevated	42
				1 model - stays at 0; stays at 0	51
11	AKT	41 models - oscillates		41 models - oscillates; drops to 0
		4 models - stays at 0	47, 50, 51, 53	3 models - stays at 0; stays at 0	47, 51, 53
		3 models - elevated	42, 52, 55	2 models - elevated; elevated	42, 52
				1 model - stays at 0; oscillates	50
				1 model - elevated; oscillates	55
12	INS	43 models - oscillates		42 models - oscillates; drops to 0
		5 models - elevated	42, 47, 52, 53, 55	4 models - elevated; elevated	42, 47, 52, 53
				1 model - oscillates; oscillates	50
				1 model - elevated; oscillates	55
13	ADIPOQ	43 models - stays at 0		43 models - stays at 0; stays at 0
		5 models - elevated	42, 47, 52, 53, 55	5 models - elevated; elevated	42, 47, 52, 53, 55
14	ERK	48 models - stays at 0		48 models - stays at 0; stays at 0
15	PI3K	42 models - oscillates		42 models - oscillates; drops to 0
		4 models - stays at 0	42, 51, 52, 55	4 models - stays at 0; stays at 0	42, 51, 52, 55
				1 model - oscillates; oscillates	50
				1 model - oscillates; elevated	53
16	MAPK14	44 models - stays at 0		41 models - stays at 0; oscillates
		3 models - oscillates	50, 53, 55	3 models - stays at 0; stays at 0	47, 51, 52
		1 model - elevated	42	2 models - oscillates; oscillates	50, 55
				1 model - elevated; elevated	42
				1 model - oscillates; drops to 0	53
17	MAPK3	44 models - oscillates		41 models - oscillates; drops to 0
		2 models - elevated	42, 53	3 models - oscillates; oscillates	50, 52, 55
		2 models - stays at 0	47, 51	2 models - elevated; elevated	42, 53
				2 models - stays at 0; stays at 0	47, 41
18	HCK	43 models - oscillates		41 models - oscillates; drops to 0
		4 models - elevated	42, 47, 52, 53	4 models - elevated; elevated	42, 47, 52, 53
		1 model - stays at 0	51	2 models - oscillates; oscillates	50, 55
				1 model - stays at 0; stays at 0	51
19	TNF	46 models - stays at 0		41 models - stays at 0; oscillates
		1 model - mid-level	42	5 models - stays at 0; stays at 0	47, 51, 52, 53, 55
		1 model - oscillates	50	1 model - mid-level; elevated	42
				1 model - oscillates; oscillates	50
20	MAPK1	47 models - elevated		42 models - elevated; drops to 0
		1 model - oscillates	50	4 models - elevated; elevated	42, 47, 51, 53
				2 models - elevated; oscillates	50, 55
21	IKBKB	42 models - oscillates		41 models - oscillates; drops to 0
		6 models - stays at 0	42, 47, 51, 52, 53, 55	6 models - stays at 0; stays at 0	42, 47, 51, 52, 53, 55
				1 model - oscillates; oscillates	50
22	PTGS2	48 models - stays at 0		48 models - stays at 0; stays at 0
23	IKBKG	43 models - oscillates		41 models - oscillates; drops to 0
		4 models - stays at 0	47, 51, 53, 55	4 models - stays at 0; stays at 0	47, 51, 53, 55
		1 model - elevated	42	2 models - oscillates; oscillates	50, 52
				1 model - elevated; elevated	42
24	RIPK1	48 models - stays at 0		41 models - stays at 0; oscillates
				7 models - stays at 0; stays at 0	42, 47, 50, 51, 52, 53, 55
25	IL18	43 models - elevated		41 models - elevated; drops to 0
		3 models - oscillates	47, 50, 55	2 models - elevated; elevated	42, 52
		2 models - stays at 0	51, 53	2 models - oscillates; oscillates	50, 55
				2 models - stays at 0; stays at 0	51, 53
				1 model - oscillates; drops to 0	47
26	CXCL12	44 models - stays at 0		44 models - stays at 0; stays at 0
		2 models - elevated	42, 55	1 model - elevated; elevated	42
		2 models - oscillates	50, 53	1 model - oscillates; oscillates	50
				1 model - oscillates; elevated	53
				1 model - mid-level; oscillates	55
27	CCL2	43 models- oscillates		41 models - oscillates; drops to 0
		4 models - elevated	42, 47, 52, 53	4 models - elevated; elevated	42, 47, 52, 53
		1 model - stays at 0	51	2 models - oscillates; oscillates	50, 55
				1 model - drops to 0; drops to 0	51
28	CD40LG	44 models - stays at 0		44 models - stays at 0; stays at 0
		3 models - oscillates	50, 53, 55	2 models - oscillates; oscillates	50, 55
		1 model - elevated	42	1 model - elevated; elevated	42
				1 model - oscillates; elevated	53
29	CD14	46 models - stays at 0		42 models - stays at 0; oscillates
		1 model - elevated	42	4 models -stays at 0; stays at 0	47, 52, 53, 55
		1 model - oscillates	50	1 model - elevated; elevated	42
				1 model - oscillates; oscillates	51
30	AGT	46 models - oscillates		43 models - oscillates; drops to 0
		1 model - elevated	42	3 models - oscillates; oscillates	50, 52, 55
		1 model - stays at 0	51	1 model - elevated; elevated	42
				1 model - stays at 0; stays at 0	51
31	TRAF2	43 models - oscillates		41 models - oscillates; drops to 0
		4 models - stays at 0	47, 51, 53, 55	4 models - stays at 0	47, 51, 53, 55
		1 model - elevated	42	2 models - oscillates; oscillates	50, 52
				1 model - elevated; elevated	42
32	IFNG	42 models - oscillates		42 models - oscillates; drops to 0
		5 models - elevated	42, 47, 52, 53, 55	4 models - elevated; elevated	42, 47, 52, 53
		1 model - stays at 0	50	1 model - stays at 0; oscillates	50
				1 model - elevated; oscillates	55
33	TLR2	46 models - stays at 0		41 models - stays at 0; oscillates
		2 models - oscillates	50, 52	5 models - stays at 0; stays at 0	42, 47, 51, 53, 55
				2 models - oscillates; oscillates	50, 52
34	TGFA	41 models - oscillates		41 models - oscillates; drops to 0
		7 models - stays at 0	42, 47, 50, 51 52, 53, 55	7 models - stays at 0; stays at 0	42, 47, 50, 51 52, 53, 55
35	PTEN	48 models - stays at 0		48 models - stays at 0; stays at 0
36	CD40	44 models - oscillates		42 models - oscillates; drops to 0
		4 models - elevated	42, 47, 52, 53	4 models - elevated; elevated	42, 47, 52, 53
				2 models - oscillates; oscillates	50, 55
37	TIMP3	46 models - stays at 0		41 models - stays at 0; oscillates
		2 models - oscillates	42, 50	5 models - stays at 0; stays at 0	47, 51, 52, 53, 55
				1 model - elevated; elevated	42
				1 model - oscillates; oscillates	50
38	MAP3K1	45 models - stays at 0		41 models - stays at 0; oscillates
		2 models - oscillates	50, 55	4 models - stays at 0; stays at 0	47, 51, 52, 53
		1 model - elevated	42	2 models - oscillates; oscillates	50, 55
				1 model - elevated; elevated	42
39	STAT1	47 models - stays at 0		47 models - stays at 0; stays at 0
		1 model - elevated	42	1 model - elevated; elevated	42
40	NOS3	46 models - stays at 0		42 models - stays at 0; oscillates
		1 model - elevated	42	5 models - stays at 0; stays at 0	47, 51, 52, 53, 55
		1 model - oscillates	50	1 model - elevated; elevated	42
				1 model - oscillates; oscillates	50
41	ERBB2	43 models - oscillates		41 models - oscillates; drops to 0
		4 models - elevated	42, 47, 52, 53	4 models - elevated; elevated	42, 47, 52, 53
		1 model - stays at 0	51	2 models - oscillates; oscillates	50, 55
				1 model - stays at 0; stays at 0	51
42	TNFRSF1A	43 models - oscillates		41 models - oscillates; drops to 0
		4 models - elevated	42, 47, 52, 53	4 models - elevated; elevated	42, 47, 52, 53
		1 model - stays at 0	51	2 models - oscillates; oscillates	50, 55
				1 model - stays at 0; stays at 0	51
43	RIPK2	45 models - stays at 0		41 models - stays at 0; oscillates
		2 models - oscillates	50, 52	4 models - stays at 0; stays at 0	47, 51, 53, 55
		1 model - elevated	42	2 models - oscillates; oscillates	50, 52
				1 model - elevated; elevated	42
44	CHUK	42 models - oscillates		41 models - oscillates; drops to 0
		5 models - stays at 0	47, 51, 52, 53, 55	5 models - stays at 0; stays at 0	47, 51, 52, 53, 55
		1 model - elevated	42	1 model - oscillates; oscillates	50
				1 model - elevated; elevated	42
45	AKT2	42 models - oscillates		42 models - oscillates; oscillates
		5 models - stays at 0	47, 51, 52, 53, 55	5 models - stays at 0; stays at 0	47, 51, 52, 53, 55
		1 model - elevated	42	1 model - elevated; elevated	42
46	XDH	43 models - oscillates		41 models - oscillates; drops to 0
		4 models - elevated	42, 47, 52, 53	4 models - elevated; elevated	42, 47, 52, 53
		1 model - stays at 0	51	2 models - oscillates; oscillates	50, 55
				1 model - stays at 0; stays at 0	51
47	TNFRSF1B	48 models - stays at 0		48 models - stays at 0; stays at 0
48	NFKBIA	45 models - stays at 0		40 models - stays at 0; oscillates
		2 models - oscillates	50, 52	5 models - stays at 0; stays at 0	47, 51, 52, 53, 55
		1 model - elevated	42	2 models - oscillates; oscillates	50, 52
				1 model - elevated; elevated	42
49	IFNA1	44 models - oscillates		41 models - oscillates; drops to 0
		3 models - stays at 0	42, 47, 51	3 models - stays at 0; stays at 0	42, 47, 51
		1 model - elevated	53	3 models - oscillates; oscillates	50, 52, 55
				1 model - elevated; elevated	53
50	MYD88	48 models - stays at 0		48 models - stays at 0; stays at 0
51	IFI16	42 models - oscillates		41 models - oscillates; stays at 0
		5 models - stays at 0	47, 51, 52, 53, 55	5 models - stays at 0; stays at 0	47, 51, 52, 53, 55
		1 model - elevated	42	1 model - oscillates; oscillates	50
				1 model - elevated; elevated	42
52	EP300	46 models - stays at 0		41 models - stays at 0; oscillates
		1 model - elevated	42	5 models - stays at 0; stays at 0	47, 51, 52, 53, 55
		1 model - oscillates	50	1 model - elevated; elevated	42
				1 model - oscillates; oscillates	50
53	IRAK1	48 models - stays at 0		48 models - stays at 0; stays at 0
54	IRF5	48 models - stays at 0		48 models - stays at 0; stays at 0
55	TLR9	41 models - oscillates		41 models - oscillates; drops to 0
		7 models - stays at 0	42, 47, 50, 51, 52, 53, 55	7 models - stays at 0; stays at 0	42, 47, 50, 51, 52, 53, 55
56	CXCL8	41 models - oscillates		41 models - oscillates; drops to 0
		7 models - stays at 0	42, 47, 50, 51, 52, 53, 55	7 models - stays at 0; stays at 0	42, 47, 50, 51, 52, 53, 55
57	IRF7	48 models - stays at 0		48 models - stays at 0; stays at 0
58	IRF3	45 models - stays at 0		42 models - stays at 0; oscillates
		2 models - oscillates	50, 55	2 models - stays at 0; stays at 0	47, 51
		1 model - elevated	42	2 models - oscillates; oscillates	50, 55
				1 model - elevated; elevated	42
				1 model - stays at 0; elevated	53
59	IFNB1	48 models - stays at 0		48 models - stays at 0; stays at 0
60	TLR3	45 models - stays at 0		45 models - stays at 0; stays at 0
		2 models - oscillates	50, 55	2 models - oscillates; oscillates	50, 55
		1 model - elevated	42	1 model - elevated; elevated	42
61	TBK1	45 models - stays at 0		45 models - stays at 0; stays at 0
		2 models - oscillates	50, 55	2 models - oscillates; oscillates	50, 55
		1 model - elevated	42	1 model - elevated; elevated	42
62	CAMP
